# Supplementary material for: Cationic Amphipathic Antimicrobial Peptides Perturb the Inner Membrane of Germinated Spores Thus Inhibiting Their Outgrowth
Source: Front Microbiol. 2018 Sep 26;9:2277. doi: 10.3389/fmicb.2018.02277 (PMC6168669; doi:10.3389/fmicb.2018.02277)
Supplement: Supplementary file 1 [file Table_1.XLSX]

## Sheet: Counts
The percentage of spores were quantified after 4.5 hrs of imaging to obtain an overview of the outcome of the different AMP treatments
Treatment		Biological repeat (br)	Absolute counts				Mean of biological repeats				Percentage of total spore counts
			Total counts	Dormant	Germinted	Outgrowth	Total counts	Dormant	Germinted	Outgrowth	Total counts	Dormant	Germinted	Outgrowth
Untreated	untreated	br1	316	11	305	299	236.5	5.5	231	217	100	2.32558	97.6744	91.7548
		br2	157	0	157	135
TC19	Coated	br1	83	5	78	72	164	8	156	146	100	4.87805	95.122	89.0244
		br2	245	11	234	220
	Lethal	br1	94	1	93	0	287	3	284	0	100	1.0453	98.9547	0
		br2	480	5	475	0
	Sub-lethal	br1	94	1	93	23	111.5	8.5	103	32.5	100	7.62332	92.3767	29.148
		br2	129	16	113	42
TC84	Coated	br1	93	1	92	91	118.5	6	112.5	107	100	5.06329	94.9367	90.2954
		br2	144	11	133	123
	Lethal	br1	205	5	200	0	195	2.5	192.5	0	100	1.28205	98.7179	0
		br2	185	0	185	0
	Sub-lethal	br1	97	2	95	90	138	5	133	102.5	100	3.62319	96.3768	74.2754
		br2	179	8	171	115
BP2	Coated	br1	126	15	110	102	202	20	183.5	169.5	100	9.90099	90.8416	83.9109
		br2	278	25	257	237
	Lethal	br1	288	19	269	0	318	14.5	303.5	0	100	4.55975	95.4403	0
		br2	348	10	338	0
	Sub-lethal	br1	380	22	357	329	257.5	14	243	227.5	100	5.43689	94.3689	88.3495
		br2	135	6	129	126
Nisin A	Coated	br1	103	3	100	14	125.5	9	116.5	23.5	100	7.17131	92.8287	18.7251
		br2	148	15	133	33
	Lethal	br1	306	1	305	0	253.5	6.5	247	0	100	2.5641	97.4359	0
		br2	201	12	189	0
	Sub-lethal	br1	110	4	106	87	100	2.5	97.5	74	100	2.5	97.5	74
		br2	90	1	89	61

## Sheet: Start of Germination
	Untreated	TC19_Coated	TC84_Coated	BP2_Coated	NisinA_coated	TC19_inhibitory	TC84_inhibitory	BP2_inhibitory	NisinA_inhibitory	TC19_subinhibitory	TC84_subinhibitory	BP2_subinhibitory	NisinA_subinhibitory
Counts	384	228	209	325	169	370	342	499	354	174	212	380	169
Median	16.5397	14.26	18.1823	16.2167	15.1253	18.2133	16.25	18.1767	16.4323	16.012	17.3833	15.1543	16.2167
Q1	12.5027	10.212	14.1833	11.3833	11.1043	13.2083	12.25	13.1477	11.4053	11.006	13.3833	11.884	11.2167
Q3	22.5967	22.2933	29	24.0833	23.6033	23.2233	24.25	26.3733	23.4733	24.1033	23.6333	23.29	24.0333
IQR	10.094	12.0813	14.8167	12.7	12.499	10.015	12	13.2256	12.068	13.0973	10.25	11.406	12.8166
	254.667	264.133	275	262.217	271.933	251.783	119.25	155.95	97.7633	270.733	270.383	245.783	237.033
	127.567	207.5	230	228.217	258.833	152.583	115.517	148.85	83.6833	240.633	173.383	153.533	118.033
	119.467	192.4	201	227.217	201.533	109.483	109.25	147.85	80.6733	214.633	151.283	139.65	109.217
	82.1267	153.9	184	209.083	191.433	77.3633	108.25	116.75	79.6633	132.533	133.383	111.55	107.217
	80.7333	104.253	182	178.083	141.233	64.3333	105.25	105.617	74.6433	94.4533	113.383	95.3433	91.0333
	74.0567	102.3	152	156.083	140.233	64.3333	99.25	98.7433	71.6233	85.4433	101.373	92.3333	86.0333
	73.0467	95.21	140	155.217	134.233	62.3233	77.25	97.61	66.7033	84.4433	96.2733	87.49	85.0333
	72.0367	87.12	138.183	152.083	126.133	61.3233	74.25	92.7133	64.6933	72.4233	83.3833	87.3133	81.2167
	70.0167	83.07	122	151.083	114.033	52.3033	70.25	84.6633	60.5633	60.4033	77.3833	84.48	80.0333
	66.9967	74.98	119	148.217	91.9633	52.3033	65.5167	78.6333	60.5633	59.4033	72.3833	79.46	68.0333
	66.7533	69.92	116	141.083	86.9333	49.2933	63.25	77.6333	58.5533	57.4033	66.3833	78.46	65.0333
	65.7433	67.89	95.99	136.383	84.4833	49.2933	63.25	76.5	55.5333	55.4033	59.3833	77.46	53.2167
	64.9767	67.8233	90.99	129.217	82.9133	49.2933	56.25	75.4667	50.6233	52.3933	59.2833	74.45	48.2167
	63.7233	66.88	86.99	123.217	75.8833	47.2833	55.5167	72.4467	49.6133	52.3933	56.3833	71.3233	48.2167
	60.5533	66.8133	85.99	121.217	72.8633	47.2833	53.25	69.5933	49.6133	49.3933	55.3833	69.2633	47.0333
	57.5233	65.8033	84.99	113.217	70.8533	44.3233	52.25	69.5933	49.5033	48.3933	50.3833	67.3133	45.0333
	53.6333	51.7	83.1733	112.217	66.8333	43.2733	49.25	67.45	49.5033	43.3833	48.3833	66.42	44.0333
	51.6133	48.67	74	110.217	62.3733	41.3133	48.25	67.45	46.5933	42.3833	47.3833	65.42	44.0333
	46.8067	47.65	73	106.083	54.3333	41.2733	47.5167	67.45	45.4833	42.3833	46.3833	63.2433	43.0333
	46.4233	45.63	73	103.083	51.7533	40.2633	45.5167	64.44	45.4833	42.3833	46.2833	60.41	40.0333
	44.7967	45.5633	65	92.3833	50.7533	39.2633	45.25	61.42	45.4833	41.3833	42.3833	57.4	38.0333
	44.7967	45.5633	64	90.2167	47.7333	39.2633	45.25	61.42	43.5833	41.05	42.3833	56.2233	37.2167
	42.7767	44.62	64	88.3833	43.7133	39.2633	44.5167	59.3867	42.4633	40.3733	41.3833	55.39	36.2167
	41.7667	40.57	62	84.2167	42.7033	37.2633	44.25	56.5233	40.5633	37.3733	40.2833	55.39	36.2167
	41.5233	40.57	59	80.0833	38.6833	37.2633	43.25	56.5233	40.5633	37.3733	39.3833	55.39	35.0333
	40.7567	39.56	59	76.2167	36.2333	37.2633	41.5167	56.3667	39.5633	36.3733	38.3833	54.39	34.0333
	37.4833	39.4933	56	75.3833	34.6633	36.2533	40.25	55.39	39.4433	36.3733	37.3833	54.39	33.0333
	36.3333	37.53	56	62.2167	33.6633	36.2533	38.5167	54.39	39.4433	36.3733	37.3833	53.38	32.2167
	35.4733	36.52	51	60.0833	33.2233	36.2533	38.25	51.3467	38.5533	34.3733	36.3833	53.2633	32.0333
	35.3233	36.52	50.1833	59.2167	32.2133	36.2533	38.25	50.37	38.5533	34.3733	36.2833	52.38	31.2167
	34.4633	35.51	50.1833	56.3833	32.2133	36.2533	38.25	50.37	38.4433	32.3633	33.3833	52.38	31.0333
	34.3233	32.47	42	56.0833	31.6533	36.2533	37.5167	49.4833	35.5333	32.03	33.3833	51.38	30.0333
	34.3233	32.47	42	54.0833	31.6533	35.2533	37.25	48.3267	35.4233	31.3633	33.3833	51.2633	29.2167
	33.6967	32.47	41	53.2167	31.6533	34.2533	37.25	47.35	35.4233	31.3633	33.3833	51.2133	29.0333
	33.6967	32.47	39.1833	51.2167	30.6433	33.2533	36.5167	47.35	34.5333	29.3633	33.2833	49.2533	28.0333
	33.6967	30.3833	39	50.2167	30.6433	33.2533	36.25	46.4733	34.4233	28.3633	33.2833	48.2033	27.2167
	33.4533	29.44	39	49.2167	29.6333	33.2533	36.25	46.34	34.4233	28.3633	32.3833	46.2433	27.2167
	33.4533	29.44	37	46.3833	27.6233	32.2433	35.5167	45.4633	34.4233	28.3633	31.2833	44.36	27.0333
	33.4533	29.3733	36	46.0833	27.6233	32.2433	34.25	45.4633	33.5233	27.03	30.3833	44.36	26.2167
	33.4533	28.43	35	43.0833	26.1833	32.2433	34.25	45.34	32.4133	27.03	30.3833	44.2433	26.0333
	32.4433	28.43	34	42.0833	25.6133	32.2433	34.25	45.34	31.5133	25.3533	29.3833	43.35	25.2167
	32.4433	28.43	34	41.0833	25.1733	30.2433	33.5167	44.4633	31.4033	25.02	29.2833	43.2333	25.2167
	32.3033	28.43	34	40.0833	23.6033	30.2433	33.5167	44.33	30.5133	24.3533	27.3833	41.2333	24.0333
	31.4333	26.4	30.1833	38.2167	23.6033	29.2433	33.25	43.33	30.3933	24.3533	27.3833	40.35	23.2167
	31.4333	25.3233	30.1833	37.2167	23.1633	29.2433	32.5167	42.4533	29.5033	23.3533	25.3833	40.35	23.2167
	31.4333	25.3233	30	37.2167	22.6033	29.2433	32.5167	42.32	29.5033	23.3533	25.3833	39.34	23.2167
	30.6667	24.38	30	36.3833	22.6033	29.2433	32.25	42.32	29.5033	23.02	25.3833	39.34	23.2167
	30.6667	24.38	29.1833	36.0833	22.6033	28.2333	31.25	41.4433	28.4933	23.02	25.3833	39.34	22.0333
	30.4233	23.37	29	35.3833	22.6033	28.2333	31.25	41.4433	28.4933	23.02	25.3833	38.34	22.0333
	30.4233	23.37	29	34.3833	22.1633	28.2333	31.25	41.32	28.4933	23.02	25.3833	38.34	21.2167
	29.6567	23.37	29	34.2167	21.5933	28.2333	31.25	40.31	27.4933	22.3533	25.2833	36.2133	21.2167
	29.2733	23.37	29	33.0833	21.5933	28.2333	31.25	39.4333	27.4933	22.02	24.3833	36.1633	21.0333
	28.6467	23.37	29	33.0833	21.5933	27.2833	30.5167	39.4333	27.4933	21.3533	24.3833	36.1633	21.0333
	28.6467	22.36	28.1833	32.0833	21.1533	27.2333	30.25	39.4333	27.4933	21.3533	23.3833	35.33	21.0333
	28.4033	22.36	28.1833	31.3833	20.5933	27.2333	30.25	38.3	27.4933	21.02	23.3833	35.33	21.0333
	28.2633	22.36	27.1833	30.2167	20.1533	27.2333	30.25	38.3	27.4933	21.02	23.3833	35.33	20.2167
	27.6367	22.2933	27	29.3833	19.5833	27.2333	29.5167	38.2767	27.4933	20.3533	22.3833	35.33	20.0333
	27.6367	22.2933	27	29.2167	19.5833	27.2333	29.25	37.3	27.4933	20.3533	22.3833	35.2133	19.0333
	27.6367	22.2933	27	28.3833	19.1433	27.2333	29.25	37.3	27.4933	20.3533	22.3833	34.33	19.0333
	27.6367	21.34	26.1833	28.0833	18.5803	26.2733	29.25	36.4233	27.4933	20.02	21.3833	34.1533	19.0333
	27.6367	21.34	26.1833	27.3833	18.5803	26.2333	28.5167	36.4233	27.4933	19.3533	21.3833	34.1533	18.2167
	27.6367	21.34	26.1833	27.2167	18.5803	26.2333	28.25	36.4233	26.4833	19.02	21.3833	33.32	18.2167
	27.6367	21.34	25.1833	27.2167	18.1433	26.2333	28.25	36.4233	26.4833	18.3433	21.3833	33.32	18.2167
	27.3933	21.34	25	27.0833	18.1433	26.2333	28.25	36.4233	26.3733	18.3433	21.3833	33.32	18.2167
	27.3933	20.33	25	26.2167	18.1433	26.2333	28.25	36.4233	26.3733	18.3433	21.3833	32.32	18.0333
	27.3933	20.33	25	26.2167	18.1433	26.2333	28.25	36.29	25.4833	18.3433	21.3833	31.32	18.0333
	27.3933	20.33	25	25.3833	17.5753	26.2333	27.5167	36.29	25.4833	18.3433	21.3833	31.32	18.0333
	27.3933	20.33	25	25.3833	17.5753	26.2333	27.5167	35.4133	25.4833	18.3433	21.2833	31.32	17.2167
	27.2533	20.33	25	25.3833	17.5753	26.2333	27.25	35.4133	25.4833	18.3433	21.2833	31.32	17.2167
	26.6267	20.33	24.1833	25.3833	17.5753	25.2233	27.25	35.29	25.3733	18.3433	20.3833	30.32	17.2167
	26.6267	20.33	24.1833	25.2167	17.5753	25.2233	27.25	35.29	24.4733	18.02	20.3833	30.32	17.2167
	26.6267	20.33	24	25.2167	17.1333	25.2233	27.25	35.29	24.4733	18.02	20.3833	29.31	17.2167
	26.3833	20.33	24	25.0833	17.1333	25.2233	27.25	34.4133	24.4733	18.02	20.3833	28.1433	17.2167
	26.2433	19.32	23.1833	25.0833	16.5703	25.2233	26.5167	34.28	24.4733	18.02	20.3833	27.31	17.0333
	26.2433	19.32	23.1833	25.0833	16.1303	25.2233	26.5167	34.28	24.4733	18.02	20.2833	27.31	17.0333
	26.2433	19.32	23.1833	24.3833	16.1303	24.2733	26.5167	34.2567	24.4733	17.3453	20.2833	27.1933	17.0333
	25.6167	19.32	23.1833	24.2167	16.1303	24.2733	26.25	33.4033	24.4733	17.3453	20.2833	26.3	17.0333
	25.6167	19.2533	23	24.2167	15.5643	24.2733	26.25	33.28	24.3633	17.3453	20.2833	26.3	17.0333
	25.6167	18.307	23	24.0833	15.5643	24.2233	26.25	33.2467	23.4733	17.01	20.2833	26.1333	17.0333
	25.3833	18.307	23	24.0833	15.5643	24.2233	26.25	32.27	23.4733	17.01	20.2833	25.3	17.0333
	25.3833	18.307	22.1833	24.0833	15.5643	24.2233	25.25	32.27	23.4733	17.01	19.3823	25.3	17.0333
	25.2333	18.307	22.1833	24.0833	15.5643	24.2233	25.25	32.27	23.4733	16.3443	19.3823	25.3	16.2167
	25.2333	18.307	22.1833	23.3833	15.1253	24.2233	24.5167	32.27	23.4733	16.3443	19.3823	24.3	16.2167
	24.6167	18.307	22.1833	23.2167	15.1253	24.2233	24.5167	32.27	23.4733	16.3443	19.3823	24.3	16.2167
	24.6167	18.307	22	23.0833	15.1253	24.2233	24.25	32.27	23.4733	16.3443	19.3823	24.3	16.2167
	24.6167	18.307	22	23.0833	14.5593	24.2233	24.25	32.2467	23.4733	16.012	19.3823	24.3	16.0333
	24.6167	18.307	22	23.0833	14.5593	24.2233	24.25	32.2467	23.4733	16.012	19.3823	24.3	16.0333
	24.6167	18.307	21.1833	23.0833	14.5593	24.2233	23.5167	31.3933	23.4733	16.012	19.3823	24.3	16.0333
	24.6167	18.2403	21	23.0833	14.5593	24.2233	23.25	31.27	23.4733	16.012	19.3823	24.3	16.0333
	24.6167	18.2403	21	23.0833	14.5593	23.2733	23.25	31.27	23.4733	16.012	19.2823	24.1833	16.0333
	24.3733	18.2403	21	22.3833	14.5593	23.2733	22.5167	31.27	23.4733	16.012	19.2823	24.1833	16.0333
	23.6067	18.2403	21	22.3833	14.5593	23.2733	22.5167	31.2367	22.4633	15.3433	19.2823	24.1233	16.0333
	23.3633	17.295	20.1823	22.3833	14.5593	23.2233	22.5167	30.3933	22.4633	15.3433	19.2823	24.1233	15.2167
	23.3633	17.295	20	22.3833	14.5593	23.2233	22.5167	30.3933	22.4633	15.3433	18.3823	24.1233	15.2167
	23.2233	16.283	20	22.3833	14.5593	23.2233	22.5167	30.3933	22.4633	15.011	18.3823	23.29	15.2167
	22.5967	16.283	20	22.3833	14.5593	23.2233	22.25	30.3933	22.3533	15.011	18.3823	23.29	15.2167
	22.5967	16.283	20	22.3833	14.1203	23.2233	22.25	30.3933	21.4633	15.011	18.3823	23.29	15.0333
	22.5967	16.283	20	22.3833	14.1203	23.2233	22.25	30.26	21.4633	15.011	18.3823	23.29	15.0333
	22.5967	16.283	20	22.3833	13.5543	23.2233	22.25	30.26	21.4633	15.011	18.3823	23.1733	15.0333
	22.5967	16.283	19.1823	22.2167	13.5543	23.2233	22.25	30.2367	21.4633	15.011	18.3823	23.1233	15.0333
	22.2133	15.272	18.999	22.2167	13.5543	23.2233	22.25	30.2367	21.4633	15.011	18.3823	23.1233	14.2167
	22.2133	15.272	18.999	21.3833	13.5543	22.2633	22.25	30.2367	21.4633	14.3413	18.2823	22.29	14.2167
	21.5867	15.272	18.999	21.3833	13.5543	22.2633	22.25	29.26	21.4633	14.3413	18.2823	22.29	14.2167
	21.5867	15.272	18.999	21.3833	13.5543	22.2233	21.5167	29.26	21.4633	14.3413	18.2823	22.1233	14.2167
	21.5867	15.2053	18.1823	21.3833	13.5543	22.2233	21.5167	29.26	21.4633	14.3413	17.3833	22.1233	14.2167
	21.5867	15.2053	18.1823	21.2167	13.5543	22.2233	21.5167	29.26	20.4533	14.3413	17.3833	21.29	14.2167
	21.5867	15.2053	17.999	21.2167	13.5543	22.2233	21.5167	29.26	20.4533	13.3403	17.3833	21.29	14.0333
	21.3433	15.2053	17.999	21.2167	13.5543	22.2233	21.25	29.2267	20.4533	13.3403	17.3833	21.29	14.0333
	21.3433	15.2053	17.999	21.0833	13.5543	22.2233	21.25	28.25	20.4533	13.3403	17.3833	21.29	14.0333
	21.2033	15.2053	17.999	21.0833	13.1143	22.2233	21.25	28.25	20.4533	13.008	17.3833	21.1733	14.0333
	21.2033	15.2053	17.999	20.3833	13.1143	22.2233	21.25	28.25	20.4533	13.008	17.2833	21.1733	13.2167
	20.5767	15.2053	17.999	20.2167	13.1143	22.2233	21.25	28.25	20.4533	13.008	17.2833	20.29	13.2167
	20.5767	14.26	17.999	20.2167	13.1143	22.2233	21.25	28.2267	20.3433	13.008	17.2833	20.29	13.2167
	20.5767	14.26	17.999	20.2167	13.1143	22.2233	21.25	27.25	20.3433	13.008	17.2833	20.29	13.2167
	20.5767	14.26	17.1823	20.2167	12.5493	21.2633	21.25	27.25	20.3433	13.008	16.3833	20.1733	13.0333
	20.5767	14.26	17.1823	20.2167	12.5493	21.2633	21.25	27.25	20.3433	13.008	16.3833	20.1133	13.0333
	20.5767	14.26	17.1823	19.3833	12.5493	21.2633	21.25	27.25	20.3433	12.3393	16.3833	20.1133	13.0333
	20.3333	14.1933	17.1823	19.3833	12.1093	21.2633	20.5167	27.25	20.3433	12.3393	16.3833	20.1133	13.0333
	20.3333	13.248	17.1823	19.2167	12.1093	21.2633	20.5167	27.25	20.3433	12.3393	16.3833	19.28	12.2167
	20.3333	13.248	17.1823	19.2167	12.1093	21.2633	20.5167	27.2167	20.3433	12.3393	16.3833	19.28	12.2167
	19.5667	13.248	17.1823	19.2167	11.5433	21.2633	20.25	27.2167	20.3433	12.007	16.3833	19.28	12.2167
	19.5667	13.248	17.1823	19.2167	11.5433	21.2633	20.25	27.2167	20.3433	12.007	16.2833	19.28	12.0333
	19.5667	13.248	17.1823	19.2167	11.5433	21.2133	20.25	27.2167	20.3433	12.007	16.2833	19.28	12.0333
	19.5667	13.248	17.1823	19.2167	11.5433	21.2133	20.25	27.2167	19.4533	12.007	16.2833	19.28	12.0333
	19.5667	13.248	17.1823	19.0833	11.5433	21.2133	20.25	26.3733	19.4533	11.3373	16.2833	19.28	12.0333
	19.5667	13.248	17.1823	19.0833	11.5433	21.2133	20.25	26.3733	19.4533	11.3373	15.3833	19.28	12.0333
	19.5667	13.248	17.1823	19.0833	11.1043	21.2133	20.25	26.3733	19.4533	11.3373	15.3833	19.28	11.2167
	19.5667	13.1813	17.1823	19.0833	11.1043	21.2133	20.25	26.24	19.4533	11.006	15.3833	19.28	11.2167
	19.5667	13.1813	17.1823	19.0833	11.1043	21.2133	20.25	26.24	19.4533	11.006	15.3833	19.28	11.2167
	19.5667	13.1813	17.1823	18.3833	11.1043	21.2133	19.5167	26.2167	19.4533	11.006	15.3833	19.28	11.2167
	19.5667	13.1813	16.999	18.3833	11.1043	21.2133	19.5167	26.2167	19.4533	11.006	15.3833	19.1633	11.2167
	19.5667	13.1813	16.999	18.3833	11.1043	21.2133	19.5167	25.3633	19.3333	11.006	15.3833	19.1133	11.0333
	19.5667	12.236	16.999	18.3833	11.1043	21.2133	19.25	25.24	19.3333	10.3363	15.3833	19.1133	11.0333
	19.5667	12.236	16.999	18.2167	10.5383	21.2133	19.25	25.24	19.3333	10.3363	15.3833	19.1133	11.0333
	19.5667	12.236	16.999	18.2167	10.5383	21.2133	19.25	25.24	19.3333	10.3363	15.3833	18.28	11.0333
	19.5667	12.236	16.999	18.2167	10.5383	21.2133	19.25	25.24	18.4433	10.3363	15.3833	18.28	11.0333
	19.5667	12.236	16.1833	18.2167	10.5383	21.2133	19.25	25.24	18.4433	10.004	15.3833	18.28	11.0333
	19.5667	12.236	16.1833	18.2167	10.0993	21.2133	19.25	25.24	18.4433	10.004	15.3833	18.28	11.0333
	19.5667	12.236	16.1833	18.2167	10.0993	20.2633	19.25	25.24	18.4433	10.004	15.3833	18.28	11.0333
	19.5667	12.236	16.1833	18.2167	10.0993	20.2633	18.5167	25.24	18.4433	10.004	15.2833	18.28	11.0333
	19.5667	12.236	16.1833	18.2167	9.5333	20.2633	18.5167	25.24	18.3323	10.004	15.2833	18.1633	10.2167
	19.3233	12.236	16.1833	18.0833	9.5333	20.2133	18.5167	25.24	18.3323	10.004	15.2833	18.1633	10.2167
	19.3233	12.236	15.999	18.0833	9.5333	20.2133	18.25	25.2067	18.3323	10.004	15.2833	18.1103	10.2167
	19.1833	12.236	15.999	17.3833	9.5333	20.2133	18.25	25.2067	18.3323	9.003	14.3833	18.1103	10.2167
	19.1833	12.236	15.999	17.3833	9.5333	20.2133	18.25	25.2067	18.3323	9.003	14.3833	17.277	10.2167
	19.1833	12.236	15.1833	17.2167	9.5333	20.2133	18.25	25.2067	17.4333	9.003	14.3833	17.277	10.2167
	18.5567	12.236	15.1833	17.2167	9.5333	20.2133	17.5167	24.3633	17.4333	9.003	14.3833	17.277	10.0333
	18.5567	12.1693	15	17.2167	9.5333	20.2133	17.5167	24.3633	17.4333	8.3333	14.3833	17.277	10.0333
	18.5567	12.1693	15	17.2167	9.5333	20.2133	17.5167	24.23	17.4333	8.3333	14.3833	17.277	10.0333
	18.5567	12.1693	15	17.2167	9.5333	20.2133	17.5167	24.23	17.4333	8.3333	14.3833	17.277	10.0333
	18.5567	12.1693	15	17.2167	9.5333	20.2133	17.5167	24.23	17.4333	8.3333	14.3833	17.277	9.2167
	18.3153	11.224	15	17.2167	9.5333	19.2633	17.5167	24.23	17.4333	8.001	14.3833	17.277	9.2167
	18.3153	11.224	15	17.0833	9.5333	19.2133	17.5167	24.23	17.4333	8.001	14.3833	17.1603	9.2167
	18.3153	11.224	14.1833	17.0833	9.5333	19.2133	17.5167	24.23	17.4333	8.001	14.2833	17.1603	9.0333
	18.3153	11.224	14.1833	16.3833	9.0933	19.2133	17.25	24.2067	17.4333	8.001	13.3833	17.1603	9.0333
	18.3153	11.224	14.1833	16.3833	9.0933	19.2133	17.25	23.3533	17.4333	8.001	13.3833	17.1603	8.2167
	18.1733	11.224	14.1833	16.3833	9.0933	19.2133	17.25	23.3533	17.3273	8.001	13.3833	17.1603	8.2167
	18.1733	11.224	14.1833	16.3833	9.0933	19.2133	17.25	23.23	17.3273	7	13.3833	17.1073	8.2167
	18.1733	11.1573	14.1833	16.3833	8.0883	19.2133	17.25	23.23	17.3273	7	13.3833	17.1073	8.2167
	18.1733	11.1573	14	16.3833	8.0883	19.2133	17.25	23.23	17.3273	7	13.3833	17.1073	8.2167
	18.1733	11.1573	14	16.2167	8.0883	19.2133	17.25	23.23	16.4323	7	13.3833	17.1073	8.2167
	18.1733	11.1573	14	16.2167	7.0833	19.2133	17.25	23.23	16.4323	7	13.3833	16.274	8.2167
	17.5487	11.1573	14	16.2167	7.0833	19.2133	17.25	23.23	16.4323	7	13.3833	16.274	7.2167
	17.5487	10.212	14	16.2167	7.0833	19.2133	16.5167	23.23	16.4323	7	13.3833	16.274	7.2167
	17.5487	10.212	14	16.2167	7.0833	19.2133	16.5167	23.23	16.4323	7	13.3833	16.274	7.2167
	17.5487	10.212	13.1833	16.0833	7.0833	19.2133	16.5167	23.23	16.4323	7	13.2833	16.274	7.2167
	17.5487	10.212	13.1833	16.0833	7.0833	19.2133	16.5167	23.23	16.4323	7	13.2833	16.274	7.2167
	17.5487	10.212	13.1833	15.3833	7.0833	19.2133	16.5167	23.23	16.4323	7	13.2833	16.274	7.2167
	17.5487	10.212	13.1833	15.3833	7.0833	19.2133	16.25	23.23	16.4323	7	13.2833	16.274	7.2167
	17.5487	10.212	13.1833	15.3833		19.2133	16.25	23.23	16.4323	7	13.2833	16.274
	17.5487	10.212	13.1833	15.3833		18.2573	16.25	23.1967	16.4323	7	12.3833	16.274
	17.5487	10.212	13.1833	15.3833		18.2133	16.25	23.1967	16.4323	7	12.3833	16.1573
	17.5487	10.212	13.1833	15.2167		18.2133	16.25	22.3533	16.4323	7	12.3833	16.1043
	17.3063	10.212	13	15.2167		18.2133	16.25	22.3533	16.4323	7	12.2833	16.1043
	17.3063	10.212	13	15.2167		18.2133	15.5167	22.3533	16.4323		12.2833	16.1043
	17.3063	10.212	13	15.2167		18.2133	15.5167	22.3533	16.4323		11.3833	15.271
	17.3063	10.1453	13	15.2167		18.2133	15.5167	22.22	16.4323		11.3833	15.271
	17.3063	10.1453	13	15.2167		18.2133	15.5167	22.1967	16.4323		11.3833	15.271
	17.3063	10.1453	12.1833	15.2167		18.2133	15.5167	21.3433	16.4323		11.3833	15.271
	17.3063	10.1453	12.1833	15.2167		18.2133	15.5167	21.3433	16.4323		11.3833	15.271
	17.3063	10.1453	12.1833	15.2167		18.2133	15.5167	21.22	16.4323		11.3833	15.271
	17.3063	10.1453	12	15.2167		18.2133	15.5167	21.22	16.4323		11.3833	15.271
	17.1653	9.2	12	15.0833		18.2133	15.25	21.22	16.4323		11.3833	15.271
	17.1653	9.2	11.1832	15.0833		18.2133	15.25	21.22	16.3213		11.2833	15.271
	17.1653	9.2	11.1832	15.0833		18.2133	15.25	21.22	16.3213		11.2833	15.1543
	17.1653	9.2	11	15.0833		18.2133	15.25	21.22	16.3213		11.2833	15.1543
	16.5397	9.2	11	15.0833		18.2133	15.25	21.22	16.3213		11.2833	15.1543
	16.5397	9.2	11	14.3833		18.2133	15.25	21.1867	15.4273		10.3832	15.1543
	16.5397	9.2	11	14.3833		18.2133	15.25	21.1867	15.4273		10.3832	15.1543
	16.5397	9.2	11	14.3833		17.2543	15.25	21.1867	15.4273		10.2832	15.1543
	16.5397	9.2	10.1833	14.3833		17.2543	15.25	21.1867	15.4273		10.2832	15.1543
	16.5397	9.2	10.1833	14.3833		17.2543	15.25	21.1867	15.4273		10.2832	15.1543
	16.5397	9.2	10.1833	14.3833		17.2543	15.25	20.3433	15.4273		9.3833	15.1543
	16.5397	9.2	10.1833	14.3833		17.2543	15.25	20.3433	15.4273		9.3833	15.1543
	16.5397	9.2	10.1833	14.2167		17.2073	15.25	20.3433	15.4273		9.3833	15.1543
	16.5397	9.2	10.1833	14.2167		17.2073	15.25	20.21	15.4273		9.3833	15.1543
	16.5397	9.2	10.1833	14.2167		17.2073	15.25	20.21	15.4273		9.3833	15.1543
	16.5397	9.2	10.1833	14.0833		17.2073	15.25	20.21	15.4273		9.3833	15.1543
	16.2963	9.2	10.1833	14.0833		17.2073	15.25	20.21	15.4273		9.2833	15.1543
	16.2963	9.2	10.1833	14.0833		17.2073	15.25	20.21	15.4273		9.2833	15.1543
	16.2963	9.2	10.1833	14.0833		17.2073	14.5167	20.21	15.4273		9.2833	15.1543
	16.2963	9.2	10.1833	13.3833		17.2073	14.5167	20.21	15.3163		9.2833	15.1543
	16.2963	9.2	10.1833	13.3833		17.2073	14.5167	20.21	15.3163		9.2833	15.1543
	16.2963	9.2	10.1833	13.3833		17.2073	14.5167	20.21	15.3163		9.2833	15.1543
	16.1563	9.2	10.1833	13.3833		17.2073	14.5167	20.21	15.3163		9.2833	15.1543
	16.1563	9.1333	9.9999	13.3833		17.2073	14.5167	20.21	14.4213		9.2833	15.1013
	16.1563	9.1333	9.9999	13.3833		16.2523	14.5167	20.1867	14.4213		9.2833	15.1013
	16.1563	9.1333	9.9999	13.3833		16.2523	14.5167	20.1867	14.4213		9.2833	15.1013
	15.5297	9.1333	9	13.3833		16.2523	14.5167	20.1867	14.4213		9.2833	15.1013
	15.5297	9.1333		13.2167		16.2523	14.5167	20.1867	14.4213		9.2833	15.1013
	15.5297	9.1333		13.2167		16.2523	14.5167	20.1867	14.4213		9.2833	14.268
	15.5297	9.1333		13.2167		16.2043	14.25	19.3333	14.4213		9.2833	14.268
	15.5297	9.1333		13.2167		16.2043	14.25	19.21	14.4213			14.268
	15.5297	9.1333		13.2167		16.2043	14.25	19.21	14.4213			14.268
	15.5297	9.1333		13.2167		16.2043	14.25	19.21	14.4213			14.268
	15.5297	9.1333		13.0833		16.2043	13.5167	19.21	14.4213			14.268
	15.5297	9.1333		13.0833		16.2043	13.5167	19.21	14.4213			14.268
	15.5297	9.1333		13.0833		16.2043	13.5167	19.21	14.4213			14.268
	15.5297	9.1333		13.0833		16.2043	13.5167	19.21	14.3103			14.268
	15.5297	9.1333		13.0833		16.2043	13.5167	19.21	14.3103			14.268
	15.5297	9.1333		13.0833		16.2043	13.5167	19.21	14.3103			14.268
	15.5297	9.1333		13.0833		16.2043	13.5167	19.21	14.3103			14.268
	15.5297	9.1333		13.0833		16.2043	13.5167	19.21	14.3103			14.268
	15.5297	9.1333		12.3833		16.2043	13.5167	19.21	14.3103			14.268
	15.2873	9.1333		12.3833		16.2043	13.5167	19.21	13.4163			14.268
	15.1463	9.1333		12.3833		16.2043	13.5167	19.21	13.4163			14.268
	15.1463	9.1333		12.3833		16.2043	13.5167	19.1767	13.4163			14.1513
	15.1463	9.1333		12.2167		16.2043	13.5167	19.1767	13.4163			14.1513
	15.1463			12.2167		16.2043	13.5167	19.1767	13.4163			14.1513
	15.1463			12.2167		15.2493	13.5167	19.1767	13.4163			14.1513
	14.5207			12.2167		15.2493	13.5167	19.1767	13.4163			14.1513
	14.5207			12.2167		15.2493	13.25	19.1767	13.4163			14.1513
	14.5207			12.2167		15.2493	13.25	18.3293	13.3053			14.1513
	14.5207			12.2167		15.2493	13.25	18.3293	13.3053			14.1513
	14.5207			12.2167		15.2493	13.25	18.3293	13.3053			14.1513
	14.5207			12.2167		15.2493	13.25	18.3293	13.3053			14.0983
	14.5207			12.0833		15.2023	13.25	18.3293	12.4103			14.0983
	14.5207			12.0833		15.2023	13.25	18.3293	12.4103			14.0983
	14.5207			12.0833		15.2023	13.25	18.3293	12.4103			14.0983
	14.5207			11.3833		15.2023	13.25	18.2	12.4103			14.0983
	14.5207			11.3833		15.2023	13.25	18.2	12.4103			14.0983
	14.5207			11.3833		15.2023	13.25	18.2	12.4103			13.265
	14.5207			11.3833		15.2023	12.5167	18.2	12.4103			13.265
	14.5207			11.3833		15.2023	12.5167	18.2	12.4103			13.265
	14.2783			11.3833		15.2023	12.5167	18.2	12.4103			13.265
	14.1373			11.3833		15.2023	12.5167	18.2	12.4103			13.265
	14.1373			11.3833		15.2023	12.5167	18.2	12.4103			13.265
	13.5117			11.3833		15.2023	12.5167	18.2	12.4103			13.265
	13.5117			11.0833		15.2023	12.5167	18.2	12.4103			13.265
	13.5117			11.0833		14.2463	12.5167	18.1767	12.4103			13.265
	13.5117			11.0833		14.2463	12.5167	18.1767	12.4103			13.1483
	13.5117			11.0833		14.2463	12.5167	18.1767	12.4103			13.1483
	13.5117			11.0833		14.2463	12.25	18.1767	12.4103			13.1483
	13.5117			11.0833		14.2463	12.25	18.1767	12.4103			13.1483
	13.5117			11.0833		14.2463	12.25	18.1767	12.2993			13.0953
	13.5117			11.0833		14.2463	12.25	18.1767	12.2993			13.0953
	13.5117			10.3833		14.2463	12.25	18.1767	12.2993			13.0953
	13.5117			10.3833		14.2463	12.25	18.1767	12.2993			12.262
	13.5117			10.3833		14.1993	12.25	18.1767	12.2993			12.262
	13.5117			10.3833		14.1993	12.25	18.1767	12.2993			12.262
	13.5117			10.3833		14.1993	12.25	17.3243	12.2993			12.262
	13.5117			10.3833		14.1993	11.5167	17.3243	11.4053			12.262
	13.5117			10.3833		14.1993	11.5167	17.3243	11.4053			12.262
	13.2693			10.3833		14.1993	11.5167	17.3243	11.4053			12.262
	13.2693			10.3833		14.1993	11.5167	17.3243	11.4053			12.262
	13.2693			10.3833		14.1993	11.5167	17.196	11.4053			12.262
	13.2693			10.3833		14.1993	11.5167	17.196	11.4053			12.262
	13.2693			10.3833		14.1993	11.5167	17.196	11.4053			12.262
	13.2693			10.3833		14.1993	11.5167	17.196	11.4053			12.262
	13.2693			10.3833		14.1993	11.5167	17.196	11.4053			12.262
	13.1283			10.3833		14.1993	11.5167	17.196	11.4053			12.262
	13.1283			10.3833		13.2443	11.5167	17.196	11.4053			12.262
	13.1283			10.3833		13.2443	11.5167	17.196	11.4053			12.262
	13.1283			10.3833		13.2443	11.5167	17.196	11.4053			12.1453
	13.1283			10.3833		13.2443	11.5167	17.196	11.4053			12.1453
	12.5027			10.3833		13.2443	10.5167	17.1667	11.4053			12.1453
	12.5027			10.3833		13.2443	10.5167	17.1667	11.4053			12.1453
	12.5027			10.3833		13.1963	10.5167	17.1667	11.2943			12.1453
	12.5027			10.3833		13.1963	10.5167	17.1667	10.3993			12.1453
	12.5027			10.3833		13.1963	10.5167	17.1667	10.3993			12.1453
	12.5027			10.3833		13.1963	10.5167	17.1667	10.3993			12.0923
	12.5027			10.3833		13.1963	10.5167	17.1667	10.3993			12.0923
	12.5027			10.3833		13.1963	10.5167	16.3193	10.3993			12.0923
	12.5027			10.2167		13.1963	10.5167	16.3193	10.3993			12.0923
	12.5027			10.2167		13.1963	10.5167	16.3193	10.3993			12.0923
	12.5027			10.2167		13.1963	10.5167	16.3193	10.3993			11.259
	12.5027			10.2167		13.1963	10.5167	16.3193	10.3993			11.259
	12.5027			10.2167		13.1963	10.25	16.3193	10.3993			11.259
	12.5027			10.2167		13.1963	9.5167	16.191	10.3993			11.259
	12.5027			10.2167		13.1963	9.5167	16.191	10.3993			11.259
	12.5027			10.2167		13.1963	9.5167	16.191	10.3993			11.1423
	12.5027			10.2167		13.1963	9.5167	16.191	10.3993			11.1423
	12.5027			10.2167		13.1963	9.5167	16.191	10.3993			11.1423
	12.5027			10.2167		13.1963	9.5167	16.191	10.3993			11.1423
	12.5027			10.2167		13.1963	9.5167	16.191	10.3993			11.1423
	12.2603			10.2167		12.2413	9.5167	16.191	10.3993			11.1423
	12.2603			10.2167		12.2413	9.5167	16.191	10.3993			11.1423
	12.2603			10.0833		12.2413	9.5167	16.191	10.3993			11.0893
	12.1193			10.0833		12.1943	9.5167	16.1627	10.2883			11.0893
	12.1193			10.0833		12.1943	9.5167	16.1627	9.3943			11.0893
	12.1193			10.0833		12.1943	9.5167	16.1627	9.3943			11.0893
	12.1193			10.0833		12.1943	9.5167	16.1627	9.3943			11.0893
	11.4937			10.0833		12.1943	9.25	16.1627	9.3943			10.256
	11.4937			10.0833		12.1943	9.25	16.1627	9.3943			10.256
	11.4937			10.0833		12.1943	9.25	15.3143	9.3943			10.256
	11.4937			9.0833		12.1943	9.25	15.3143	9.3943			10.256
	11.4937			9.0833		12.1943	8.5167	15.3143	9.3943			10.256
	11.4937			9.0833		12.1943	8.5167	15.3143	9.3943			10.256
	11.4937			9.0833		12.1943	8.5167	15.3143	9.3943			10.256
	11.4937			9.0833		11.2383	8.5167	15.3143	9.3943			10.256
	11.4937			9.0833		11.2383	8.5167	15.3143	9.3943			10.256
	11.4937			9.0833		11.2383	8.5167	15.3143	9.3943			10.256
	11.4937			9.0833		11.2383	8.5167	15.186	9.3943			10.256
	11.2513			8.0833		11.2383	8.5167	15.186	9.3943			10.256
	11.2513			8.0833		11.2383	8.5167	15.186	9.3943			10.1393
	11.1103			8.0833		11.2383	8.25	15.186	9.2833			10.1393
	11.1103			8.0833		11.2383	8.25	15.186	9.2833			10.1393
	10.4847			8.0833		11.1913	7.5167	15.186	9.2833			10.1393
	10.4847			8.0833		11.1913	7.5167	15.186	9.2833			10.1393
	10.4847			8.0833		11.1913	7.5167	15.186	8.3883			10.1393
	10.4847			8.0833		11.1913	7.5167	15.186	8.3883			10.1393
	10.4847			8.0833		11.1913	7.5167	15.186	8.3883			10.1393
	10.4847			8.0833		11.1913	7.5167	15.1577	8.3883			10.1393
	10.4847			8.0833		11.1913	7.5167	15.1577	8.3883			10.1393
	10.4847			8.0833		11.1913	7.5167	15.1577	8.3883			10.1393
	10.4847					11.1913	7.5167	15.1577	8.3883			10.0863
	10.4847					11.1913	7.5167	14.3093	8.3883			10.0863
	10.4847					11.1913	7.5167	14.3093	8.3883			10.0863
	10.4847					11.1913	7.5167	14.3093	8.3883			10.0863
	10.4847					10.2363	7.5167	14.3093	8.3883			9.253
	10.4847					10.2363	7.5167	14.3093	8.3883			9.253
	10.2423					10.2363	7.5167	14.3093	8.3883			9.253
	10.2423					10.2363	7.5167	14.3093	7.3833			9.253
	10.2423					10.2363	7.5167	14.3093	7.3833			9.253
	10.1013					10.2363	7.5167	14.3093	7.3833			9.253
	10.1013					10.2363	7.5167	14.181	7.3833			9.1363
	9.4757					10.1883	7.5167	14.181	7.3833			9.1363
	9.4757					10.1883	7.5167	14.181	7.3833			9.1363
	9.4757					10.1883	7.25	14.181	7.3833			9.1363
	9.4757					10.1883	7.25	14.181	7.3833			9.1363
	9.4757					10.1883	7.25	14.181	7.3833			9.1363
	9.4757					10.1883	7.25	14.181	7.3833			9.1363
	9.4757					10.1883		14.1527	7.3833			9.1363
	9.4757					10.1883		14.1527	7.3833			9.1363
	9.4757					10.1883		14.1527	7.3833			9.0833
	9.4757					9.2333		14.1527	7.3833			9.0833
	9.4757					9.2333		14.1527	7.3833			9.0833
	9.4757					9.2333		13.3033	7.3833			9.0833
	9.4757					9.2333		13.3033	7.3833			9.0833
	9.4757					9.2333		13.3033	7.3833			9.0833
	9.2333					9.2333		13.3033	7.3833			9.0833
	9.2333					9.2333		13.3033	7.3833			9.0833
	9.0923					9.2333		13.3033	7.3833			8.25
	9.0923					9.2333		13.3033	7.3833			8.25
	9.0923					9.2333		13.3033				8.25
	9.0923					9.2333		13.3033				8.25
	8.4667					9.2333		13.3033				8.25
	8.4667					9.2333		13.3033				8.25
	8.4667					9.2333		13.3033				8.25
	8.4667					9.2333		13.176				8.25
	8.4667					9.1863		13.176				8.25
	8.4667					9.1863		13.176				8.25
	8.4667					9.1863		13.176				8.25
	8.4667					9.1863		13.176				8.1333
	8.4667					8.1833		13.176				8.1333
	8.4667					8.1833		13.176				8.1333
	8.4667					8.1833		13.1477				8.1333
	8.4667					8.1833		13.1477				8.1333
	8.4667					8.1833		13.1477				8.1333
	8.4667					8.1833		13.1477				8.1333
	8.4667							13.1477				8.1333
	8.4667							13.1477				8.1333
	8.4667							13.1477				8.1333
	8.4667							13.1477				8.1333
	8.4667							13.1477				8.1333
	8.4667							13.1477				8.1333
	8.4667							13.1477				8.1333
	8.4667							13.1477				8.1333
	8.4667							13.1477				8.1333
	8.4667							13.1477				8.1333
	8.4667							13.1477
	8.4667							12.2983
	8.4667							12.2983
	8.0833							12.2983
								12.2983
								12.2983
								12.2983
								12.2983
								12.2983
								12.2983
								12.17
								12.17
								12.17
								12.17
								12.17
								12.17
								12.1427
								12.1427
								12.1427
								12.1427
								12.1427
								12.1427
								12.1427
								12.1427
								12.1427
								12.1427
								12.1427
								12.1427
								11.2933
								11.2933
								11.2933
								11.2933
								11.2933
								11.165
								11.165
								11.165
								11.165
								11.165
								11.165
								11.165
								11.165
								11.1367
								11.1367
								11.1367
								11.1367
								11.1367
								11.1367
								11.1367
								11.1367
								11.1367
								11.1367
								11.1367
								11.1367
								11.1367
								11.1367
								11.1367
								11.1367
								10.2883
								10.2883
								10.2883
								10.2883
								10.2883
								10.16
								10.16
								10.16
								10.1317
								10.1317
								10.1317
								10.1317
								10.1317
								10.1317
								10.1317
								10.1317
								10.1317
								10.1317
								10.1317
								9.2833
								9.2833
								9.2833
								9.2833
								9.2833
								9.2833
								9.2833
								9.2833
								9.2833
								9.155
								9.155
								9.1267
								9.1267
								9.1267
								9.1267
								9.1267
								8.15
								8.15
								8.15
								8.15
								8.1217
								8.1217
								8.1217
								8.1217
								8.1217
								8.1217
								7.1167
								7.1167
								7.1167
								7.1167
								7.1167
								7.1167
								7.1167
								7.1167
								7.1167
								7.1167
								7.1167
								7.1167
								7.1167
								7.1167
								7.1167
								7.1167
								7.1167

## Sheet: Germination duration
	Untreated	TC19_Coated	TC84_Coated	BP2_Coated	NisinA_coated	TC19_inhibitory	TC84_inhibitory	BP2_inhibitory	NisinA_inhibitory	TC19_subinhibitory	TC84_subinhibitory	BP2_subinhibitory	NisinA_subinhibitory
Counts	384	228	209	325	169	370	342	499	354	174	212	380	169
Median	4.036	4.0425	4	4	4.018	4.01	4	4.02	3.02	4.006	3.999	4.009	4
Q1	3.028	3.035	3	3	3.016	3.01	3	3.015	3.016	3.004	3	3.009	3
Q3	4.04	4.05075	4.001	4	4.021	5.01	5	5.026	4.022	5.00875	4	4.016	4
IQR	1.012	1.01575	1.001	1	1.005	2	2	2.011	1.006	2.00475	1	1.007	1
	8.076	13.16	19.001	13	19.099	14.034	18	19.094	14.12	18.02	16	15.049	16
	8.073	11.133	16.001	9	9.05	13.03	17	19.094	7.04	13.02	12	12.04	10
	8.07	9.11	15	8	9.05	12.03	16	18.095	7.04	12.02	12	11.032	8
	7.068	7.088	13.001	7	6.1	12.029	15	18.09	7.038	12.012	9	10.03	6
	7.063	6.08	10.001	7	6.034	10.03	15	18.09	6.04	11.01	8.999	9.03	6
	7.063	6.073	10	7	6.031	10.029	14	18.09	6.04	10.01	8	9.029	6
	7.063	6.071	8	6	6.031	9.03	14	18.09	6.033	9.016	8	9.02	6
	7.06	6.071	8	6	6.031	9.03	14	17.09	6.033	9.01	6.001	8.02	5
	6.06	6.07	7.001	6	6.03	8.03	14	17.08	6.033	8.01	6	8.019	5
	6.06	6.07	7	6	6.029	7.022	13	17.08	6.03	8.01	6	8.019	5
	6.06	6.07	7	6	5.1	7.02	13	16.084	6.03	7.012	6	8.019	5
	6.06	6.07	6.001	6	5.03	7.02	12	16.08	6.03	7.01	6	8.019	5
	6.06	6.07	6	6	5.03	7.02	12	16.08	6.03	7.01	6	7.03	5
	6.058	6.07	6	6	5.03	7.02	12	16.08	6.03	7.01	6	7.025	5
	6.057	6.07	6	6	5.03	7.01	11	16.079	6.03	7.009	6	7.023	5
	6.056	6.07	5.999	6	5.03	6.02	11	15.07	6.03	7	5.999	7.02	5
	6.055	6.07	5.001	5	5.026	6.02	11	15.07	6.03	6.013	5.999	7.02	5
	6.055	6.07	5.001	5	5.026	6.02	11	14.075	6.03	6.01	5.001	7.019	5
	6.055	5.06	5.001	5	5.026	6.02	10	14.074	6.028	6.01	5.001	7.019	5
	6.055	5.06	5.001	5	5.026	6.02	10	13.07	5.032	6.01	5.001	7.019	5
	6.055	5.06	5.001	5	5.026	6.02	9	13.07	5.032	6.01	5.001	7.019	5
	6.054	5.06	5.001	5	5.024	6.02	9	13.07	5.032	6.01	5.0001	7.019	5
	6.05	5.06	5	5	5.023	6.02	9	13.06	5.031	6.01	5	7.018	5
	6.05	5.06	5	5	5.02	6.019	8	12.06	5.031	6.01	5	6.022	5
	6.05	5.06	5	5	5.02	6.017	8	12.06	5.03	6.01	5	6.02	5
	6.05	5.06	5	5	5.02	6.017	8	12.06	5.03	6.01	5	6.02	5
	6.05	5.06	5	5	5.02	6.016	8	11.054	5.03	6.01	5	6.018	5
	5.05	5.06	5	5	5	6.016	8	11.05	5.03	6.01	5	6.018	4
	5.05	5.06	5	5	4.023	6.016	8	11.05	5.03	6.009	5	6.018	4
	5.05	5.06	5	5	4.023	6.016	8	10.05	5.03	6.009	5	6.01	4
	5.05	5.06	5	5	4.023	6.014	8	10.05	5.03	6.009	5	6	4
	5.05	5.059	5	5	4.023	6.014	8	10.05	5.03	6.008	5	5.02	4
	5.05	5.059	5	5	4.023	6.011	8	10.05	5.03	6.008	5	5.02	4
	5.05	5.059	5	5	4.023	6.01	8	10.05	5.03	6	5	5.02	4
	5.05	5.059	5	5	4.021	6.01	8	10.049	5.03	5.012	5	5.02	4
	5.05	5.059	5	5	4.021	5.02	8	9.05	5.03	5.012	5	5.02	4
	5.05	5.059	5	5	4.021	5.02	7	9.05	5.03	5.01	5	5.02	4
	5.05	5.059	5	5	4.021	5.02	7	9.049	5.03	5.01	5	5.02	4
	5.05	5.059	5	5	4.021	5.02	7	9.049	5.03	5.01	4.999	5.02	4
	5.05	5.059	5	5	4.021	5.02	7	9.04	5.03	5.01	4.999	5.02	4
	5.05	5.059	4.999	5	4.021	5.02	7	9.04	5.03	5.01	4.001	5.02	4
	5.05	5.059	4.999	5	4.021	5.02	7	9.04	5.03	5.01	4.001	5.02	4
	5.05	5.059	4.999	5	4.021	5.02	7	8.1	5.03	5.009	4.001	5.019	4
	5.05	5.058	4.999	5	4.021	5.02	6	8.04	5.03	5.009	4.001	5.019	4
	5.048	5.057	4.999	5	4.021	5.02	6	8.04	5.03	5.008	4.001	5.019	4
	5.048	5.057	4.999	5	4.021	5.02	6	8.04	5.03	5.008	4.001	5.016	4
	5.047	5.05	4.99	5	4.021	5.02	6	8.04	5.028	5.007	4.0001	5.016	4
	5.047	5.05	4.001	5	4.021	5.017	6	8.04	5.028	5.007	4.0001	5.016	4
	5.047	5.05	4.001	5	4.021	5.017	6	8.04	5.028	5.006	4	5.015	4
	5.047	4.1	4.001	5	4.021	5.017	6	8.04	5.027	5.006	4	5.015	4
	5.047	4.1	4.001	5	4.021	5.017	6	8.04	5.027	5.006	4	5.015	4
	5.047	4.053	4.001	5	4.021	5.017	6	8.039	5.027	5.006	4	5.015	4
	5.046	4.053	4.001	5	4.021	5.017	6	7.04	5.027	5.006	4	5.015	4
	5.046	4.053	4.001	5	4.021	5.017	6	7.04	5.027	5.006	4	5.015	4
	5.046	4.053	4.001	5	4.021	5.016	6	7.04	5.027	5.003	4	5.015	4
	5.046	4.053	4.001	5	4.021	5.016	6	7.04	5.027	5.003	4	5.015	4
	5.046	4.053	4.001	5	4.021	5.014	6	7.04	5.026	5	4	5.015	4
	5.046	4.05	4.001	5	4.021	5.014	6	7.04	5.026	5	4	5.015	4
	5.046	4.05	4.001	5	4.021	5.014	6	7.035	5.023	5	4	5.015	4
	5.046	4.05	4.001	5	4.021	5.014	6	7.03	5.023	5	4	5.015	4
	5.046	4.05	4.001	5	4.021	5.014	6	7.03	5.023	5	4	5.015	4
	5.046	4.05	4.001	5	4.02	5.014	6	7.03	5.023	5	4	5.015	4
	5.046	4.05	4.0001	5	4.02	5.014	6	7.03	5.02	5	4	5.015	4
	5.045	4.05	4.0001	5	4.02	5.014	5	7.03	5.02	5	4	5.015	4
	5.045	4.05	4.0001	5	4.02	5.014	5	7.03	5.02	5	4	5.015	4
	5.045	4.05	4	5	4.02	5.013	5	7.03	5.02	4.01	4	5.015	4
	5.045	4.05	4	4	4.02	5.013	5	7.03	5.02	4.01	4	5.015	4
	5.045	4.05	4	4	4.02	5.013	5	7.03	5.02	4.01	4	5.015	4
	5.045	4.05	4	4	4.02	5.013	5	7.03	4.03	4.01	4	5.015	4
	5.045	4.05	4	4	4.02	5.013	5	6.04	4.03	4.01	4	5.013	4
	5.045	4.05	4	4	4.02	5.013	5	6.034	4.03	4.01	4	5.013	4
	5.045	4.05	4	4	4.02	5.011	5	6.034	4.03	4.01	4	5.013	4
	5.045	4.05	4	4	4.02	5.011	5	6.034	4.03	4.01	4	5.013	4
	5.045	4.05	4	4	4.02	5.01	5	6.034	4.03	4.01	4	5.012	4
	5.045	4.05	4	4	4.02	5.01	5	6.034	4.03	4.009	4	5.012	4
	5.045	4.048	4	4	4.02	5.01	5	6.034	4.03	4.008	4	5.012	4
	5.045	4.048	4	4	4.02	5.01	5	6.031	4.026	4.006	4	5.01	4
	5.045	4.048	4	4	4.019	5.01	5	6.031	4.026	4.006	4	5.01	4
	5.045	4.048	4	4	4.019	5.01	5	6.031	4.026	4.006	4	5.01	4
	5.045	4.048	4	4	4.019	5.01	5	6.03	4.026	4.006	4	5.01	4
	5.045	4.048	4	4	4.018	5.01	5	6.03	4.026	4.006	4	5.01	4
	5.04	4.048	4	4	4.018	5.01	5	6.03	4.026	4.006	4	5.01	4
	5.04	4.048	4	4	4.018	5.01	5	6.03	4.026	4.006	4	5.01	4
	5.04	4.048	4	4	4.018	5.01	5	6.03	4.026	4.006	4	4.02	4
	5.04	4.048	4	4	4.018	5.01	5	6.03	4.022	4.006	4	4.02	4
	5.04	4.048	4	4	4.018	5.01	5	6.03	4.022	4.006	4	4.02	4
	5.04	4.048	4	4	4	5.01	5	6.03	4.022	4.006	4	4.02	4
	5.04	4.048	4	4	4	5.01	5	6.03	4.022	4.006	4	4.02	4
	5.04	4.048	4	4	4	5.01	5	6.03	4.022	4.005	4	4.02	4
	5.04	4.048	4	4	3.02	5.01	5	6.03	4.022	4.005	4	4.02	4
	5.04	4.048	4	4	3.02	5.01	5	6.03	4.022	4.005	4	4.02	4
	5.04	4.048	4	4	3.02	5.01	5	6.03	4.022	4.005	4	4.02	4
	5.04	4.048	4	4	3.02	5.01	5	6.03	4.022	4.005	4	4.016	4
	5.04	4.048	4	4	3.02	5.01	5	6.03	4.022	4.005	4	4.016	4
	4.04	4.048	4	4	3.02	5.01	5	6.029	4.022	4.002	4	4.016	4
	4.04	4.048	4	4	3.02	5.01	5	6.029	4.022	4.002	4	4.016	4
	4.04	4.048	4	4	3.02	5.009	5	6.029	4.022	4	3.999	4.016	4
	4.04	4.048	4	4	3.02	5.009	5	5.03	4.022	4	3.999	4.016	4
	4.04	4.048	4	4	3.02	5.009	5	5.03	4.022	4	3.999	4.016	4
	4.04	4.047	4	4	3.02	5.009	5	5.03	4.022	4	3.999	4.013	3
	4.04	4.047	4	4	3.018	4.02	5	5.03	4.022	4	3.999	4.013	3
	4.04	4.047	4	4	3.016	4.02	5	5.03	4.022	4	3.999	4.012	3
	4.04	4.047	4	4	3.016	4.02	5	5.03	4.022	4	3.999	4.012	3
	4.04	4.047	4	4	3.016	4.02	5	5.03	4.022	4	3.999	4.012	3
	4.04	4.047	4	4	3.016	4.02	5	5.03	4.022	4	3.999	4.012	3
	4.04	4.047	4	4	3.016	4.02	5	5.03	4.022	4	3.999	4.012	3
	4.04	4.047	4	4	3.016	4.014	5	5.03	4.022	3.01	3.999	4.012	3
	4.04	4.047	4	4	3.016	4.014	5	5.03	4.022	3.01	3.001	4.012	3
	4.04	4.047	4	4	3.016	4.014	5	5.03	4.022	3.01	3.001	4.012	3
	4.04	4.047	4	4	3.016	4.014	4	5.03	4.022	3.01	3.001	4.012	3
	4.04	4.047	4	4	3.016	4.014	4	5.03	4.022	3.01	3.001	4.012	3
	4.04	4.047	4	4	3.016	4.014	4	5.029	4.022	3.01	3.001	4.012	3
	4.04	4.045	3.999	4	3.016	4.014	4	5.029	4.022	3.01	3.001	4.012	3
	4.04	4.045	3.999	4	3.016	4.014	4	5.029	4.022	3.01	3.001	4.012	3
	4.04	4.04	3.999	4	3.016	4.011	4	5.029	4.022	3.01	3.001	4.012	3
	4.04	4.04	3.999	4	3.016	4.011	4	5.026	4.022	3.01	3.001	4.012	3
	4.04	4.04	3.999	4	3.016	4.011	4	5.026	4.022	3.009	3.0001	4.012	3
	4.04	4.04	3.999	4	3.016	4.011	4	5.026	4.021	3.009	3.0001	4.012	3
	4.04	4.04	3.999	4	3.016	4.011	4	5.026	4.021	3.009	3	4.012	3
	4.04	3.04	3.999	4	3.016	4.011	4	5.026	4.021	3.009	3	4.012	3
	4.04	3.04	3.999	4	3.016	4.011	4	5.026	4.021	3.009	3	4.012	3
	4.04	3.04	3.999	4	3.016	4.011	4	5.026	4.021	3.008	3	4.012	3
	4.04	3.04	3.999	4	3.016	4.011	4	5.026	4.021	3.008	3	4.012	3
	4.04	3.04	3.999	4	3.016	4.011	4	5.026	4.021	3.008	3	4.012	3
	4.04	3.04	3.999	4	3.016	4.011	4	5.026	4.02	3.008	3	4.012	3
	4.04	3.04	3.999	4	3.016	4.011	4	5.026	4.02	3.005	3	4.012	3
	4.04	3.04	3.999	4	3.016	4.011	4	5.024	4.02	3.005	3	4.012	3
	4.04	3.04	3.001	4	3.016	4.011	4	5.024	4.02	3.004	3	4.012	3
	4.04	3.04	3.001	4	3.016	4.011	4	5.024	4.02	3.004	3	4.012	3
	4.038	3.04	3.001	4	3.016	4.011	4	5.024	4.02	3.004	3	4.012	3
	4.038	3.04	3.001	4	3.016	4.011	4	5.024	4.02	3.004	3	4.012	3
	4.038	3.04	3.001	4	3.016	4.011	4	5.024	4.02	3.004	3	4.012	3
	4.038	3.04	3.001	4	3.016	4.011	4	5.024	4.02	3.004	3	4.012	3
	4.038	3.04	3.001	4	3.016	4.011	4	5.024	4.02	3.004	3	4.012	3
	4.038	3.037	3.0001	4	3.015	4.011	4	5.024	4.02	3.004	3	4.012	3
	4.037	3.037	3.0001	4	3.013	4.011	4	5.024	4.02	3.004	3	4.012	3
	4.037	3.037	3	4	3.013	4.011	4	5.02	4.02	3.004	3	4.012	3
	4.037	3.036	3	4	3.01	4.011	4	5.02	4.02	3.004	3	4.012	3
	4.037	3.036	3	4	3.01	4.011	4	5.02	4.02	3.004	3	4.012	3
	4.037	3.036	3	4	3.01	4.011	4	5.02	4.02	3.004	3	4.012	3
	4.037	3.036	3	4	3.01	4.011	4	5.02	4.02	3.004	3	4.012	3
	4.037	3.036	3	4	3.01	4.01	4	5.02	4.02	3.004	3	4.012	3
	4.037	3.036	3	4	3.01	4.01	4	5.02	4.02	3.004	3	4.012	3
	4.037	3.036	3	4	3	4.01	4	5.02	4.02	3.004	3	4.012	3
	4.037	3.036	3	4	3	4.01	4	5.02	4.02	3.004	3	4.012	3
	4.037	3.036	3	4	2.011	4.01	4	5.02	4.02	3.004	3	4.012	3
	4.037	3.036	3	4	2.011	4.01	4	5.02	4.02	3.004	3	4.012	3
	4.037	3.036	3	4	2.01	4.01	4	5.02	4.02	3.004	3	4.012	2
	4.037	3.036	3	4	2.01	4.01	4	5.02	4.02	3.004	3	4.012	2
	4.037	3.036	3	4	2.01	4.01	4	5.02	4.02	3.004	3	4.012	2
	4.037	3.036	3	4	2.01	4.01	4	5.02	4.02	3	3	4.012	2
	4.037	3.036	3	4	2.01	4.01	4	5.02	4.02	3	3	4.012	2
	4.037	3.036	3	4	2.01	4.01	4	5.02	4.02	3	3	4.012	2
	4.037	3.036	3	4	2.01	4.01	4	5.02	4.017	3	3	4.012	2
	4.037	3.036	3	4	2.01	4.01	4	5.02	4.017	3	3	4.012	2
	4.037	3.036	3	4	2.01	4.01	4	5.02	4.017	3	3	4.012	2
	4.037	3.036	3	4	2.01	4.01	4	5.02	4.017	3	3	4.01	2
	4.037	3.036	3	4	2.01	4.01	4	5.02	4.017	3	3	4.01	2
	4.037	3.036	3	4	2.01	4.01	4	5.02	4.017	3	3	4.01	2
	4.037	3.036	3	4	2.01	4.01	4	5.02	3.021	2.003	3	4.01	2
	4.037	3.036	3	4	2.01	4.01	4	5.02	3.021	2.003	3	4.01	2
	4.037	3.036	3	4	2.01	4.01	4	5.02	3.021	2.003	3	4.01	2
	4.037	3.036	3	4	2.01	4.01	4	5.02	3.021	2.003	3	4.01	2
	4.037	3.036	3	4	2.01	4.01	4	5.02	3.021	2.003	3	4.01	2
	4.037	3.036	3	4	2.01	4.01	4	5.02	3.021	2.003	3	4.01	2
	4.037	3.036	3	4	1.01	4.01	4	4.03	3.021	2.003	3	4.01	2
	4.037	3.036	3	4	1.005	4.01	4	4.024	3.021	2.003	3	4.01	2
	4.037	3.036	3	4	1	4.01	4	4.024	3.021	2.003	3	4.01	1
	4.037	3.035	3	4	1	4.01	4	4.024	3.021	2	3	4.01	1
	4.037	3.035	3	4		4.01	4	4.024	3.021	2	3	4.01
	4.037	3.035	3	4		4.01	4	4.024	3.021	2	3	4.01
	4.037	3.035	3	4		4.01	4	4.024	3.021	2	3	4.01
	4.037	3.035	3	4		4.01	4	4.024	3.021	2	3	4.01
	4.037	3.035	3	4		4.01	4	4.024	3.021	1	3	4.01
	4.037	3.035	3	4		4.01	4	4.024	3.021		3	4.01
	4.037	3.035	3	3		4.01	4	4.024	3.021		3	4.01
	4.037	3.035	3	3		4.01	4	4.024	3.02		3	4.01
	4.037	3.035	3	3		4.01	4	4.024	3.02		3	4.01
	4.037	3.035	3	3		4.01	4	4.024	3.02		2.999	4.01
	4.037	3.033	3	3		4.01	4	4.024	3.02		2.999	4.01
	4.036	3.033	3	3		4.01	4	4.024	3.02		2.999	4.01
	4.036	3.033	2.999	3		4.01	4	4.024	3.02		2.999	4.01
	4.036	3.033	2.999	3		4.01	4	4.024	3.02		2.999	4.01
	4.036	3.033	2.999	3		4.01	4	4.021	3.02		2.999	4.01
	4.036	3.033	2.999	3		4.01	4	4.021	3.02		2.999	4.01
	4.036	3.03	2.999	3		4.01	4	4.021	3.02		2.999	4.01
	4.036	3.03	2.999	3		4.01	4	4.021	3.02		2.999	4.01
	4.036	3.03	2.999	3		4.01	4	4.021	3.02		2.999	4.01
	4.036	3	2.999	3		4.01	4	4.021	3.02		2.999	4.01
	4.036	3	2.999	3		4.01	4	4.021	3.02		2.999	4.009
	4.036	2.03	2.999	3		4.01	4	4.021	3.02		2.999	4.009
	4.036	2.03	2.999	3		4.01	4	4.021	3.02		2.999	4.009
	4.036	2.03	2	3		4.01	4	4.021	3.02		2.999	4.009
	4.036	2.03	2	3		4.01	4	4.021	3.02		2.001	4.009
	4.036	2.024	2	3		4.01	4	4.021	3.02		2.001	4.009
	4.036	2.024	2	3		4.01	4	4.021	3.02		2	4.009
	4.036	2.024	2	3		4.01	4	4.021	3.02		2	4.009
	4.036	2.024	2	3		4.01	4	4.021	3.02		2	4.009
	4.036	2.024	2	3		4.01	4	4.021	3.02		2	4.009
	4.036	2.024	2	3		4.01	4	4.021	3.02		2	3.013
	4.036	2.024	2	3		4.01	4	4.021	3.02		2	3.013
	4.036	2.024	2	3		4.01	4	4.021	3.02		2	3.013
	4.036	2.024	2	3		4.01	4	4.021	3.02		2	3.013
	4.036	2.024	1.999	3		4.01	4	4.021	3.02		2	3.013
	4.036	2.024	1.999	3		4.01	4	4.021	3.017		1.999	3.013
	4.036	2.024	1.999	3		4.01	4	4.021	3.017		1.001	3.01
	4.036	2.024	1.999	3		4.01	3	4.021	3.017		1	3.01
	4.036	2.024	1	3		4.01	3	4.021	3.017		1	3.01
	4.036	2.023	1	3		4.01	3	4.021	3.017		1	3.01
	4.036	2.02		3		4.01	3	4.021	3.017		1	3.01
	4.036	2.02		3		4.01	3	4.021	3.017		1	3.01
	4.036	2.02		3		4.01	3	4.021	3.017		0.9999	3.01
	4.036	2.02		3		4.01	3	4.021	3.017			3.01
	4.036	2.02		3		4.01	3	4.021	3.017			3.01
	4.03	2.02		3		4.01	3	4.02	3.017			3.01
	4.03	2.02		3		4.01	3	4.02	3.017			3.01
	4.03	2.02		3		4.01	3	4.02	3.017			3.01
	4.03	2.02		3		4.01	3	4.02	3.017			3.01
	4.03	1.012		3		4.01	3	4.02	3.017			3.01
	4.03	1.012		3		4.01	3	4.02	3.017			3.01
	4.03	1.012		3		4.01	3	4.02	3.017			3.01
	4.03	1.012		3		4.01	3	4.02	3.017			3.01
	4.03	1.012		3		4.01	3	4.02	3.017			3.01
	4.03	1.012		3		4.01	3	4.02	3.017			3.01
	4.03	1.012		3		4.01	3	4.02	3.017			3.01
	4.03	1.012		3		4.01	3	4.02	3.017			3.01
	4.03	1.012		3		4.01	3	4.02	3.017			3.01
	4.03	1.01		3		4.01	3	4.02	3.017			3.01
	4.03			3		4.01	3	4.02	3.017			3.01
	4.03			3		4.01	3	4.02	3.017			3.01
	4.03			3		4.01	3	4.02	3.016			3.01
	4.03			3		4.009	3	4.02	3.016			3.01
	3.03			3		4.009	3	4.02	3.016			3.01
	3.03			3		4.009	3	4.02	3.016			3.01
	3.03			3		4.009	3	4.02	3.016			3.01
	3.03			3		4.009	3	4.02	3.016			3.01
	3.03			3		4.009	3	4.02	3.016			3.01
	3.03			3		4.009	3	4.02	3.016			3.01
	3.03			3		4.009	3	4.02	3.016			3.01
	3.03			3		4.009	3	4.02	3.016			3.01
	3.03			3		4.009	3	4.02	3.016			3.01
	3.03			3		4.009	3	4.02	3.016			3.01
	3.03			3		4.006	3	4.02	3.016			3.01
	3.03			3		4.006	3	4.02	3.016			3.01
	3.03			3		4.006	3	4.02	3.016			3.01
	3.03			3		4.006	3	4.02	3.016			3.01
	3.03			3		4.006	3	4.02	3.016			3.01
	3.03			3		4.006	3	4.02	3.016			3.01
	3.03			3		4.006	3	4.02	3.016			3.01
	3.03			3		4.006	3	4.02	3.016			3.01
	3.03			3		3.1	3	4.02	3.016			3.01
	3.03			3		3.011	3	4.02	3.016			3.01
	3.03			3		3.011	3	4.02	3.016			3.01
	3.03			3		3.011	3	4.02	3.016			3.009
	3.03			3		3.011	3	4.02	3.016			3.009
	3.03			3		3.011	3	4.02	3.016			3.009
	3.03			3		3.011	3	4.02	3.016			3.009
	3.03			3		3.011	3	4.02	3.016			3.009
	3.03			3		3.01	3	4.02	3.016			3.009
	3.03			3		3.01	3	4.02	3.016			3.009
	3.03			3		3.01	3	4.02	3.016			3.009
	3.03			3		3.01	3	4.02	3.016			3.009
	3.03			3		3.01	3	4.02	3.016			3.009
	3.03			3		3.01	3	4.02	3.016			3.009
	3.03			3		3.01	3	4.02	3.016			3.009
	3.03			3		3.01	3	4.02	3.016			3.009
	3.03			3		3.01	3	4.02	3.016			3.009
	3.03			3		3.01	3	4.02	3.016			3.009
	3.03			3		3.01	3	4.02	3.012			3.009
	3.03			3		3.01	3	4.02	3.012			3.009
	3.03			3		3.01	3	4.02	3.012			3.009
	3.028			3		3.01	3	4.02	3.012			3.009
	3.028			3		3.01	3	4.02	3.012			3.009
	3.028			3		3.01	3	4.02	3.012			3.009
	3.028			3		3.01	3	4.02	3.012			3.009
	3.028			3		3.01	3	4.02	3.012			3.009
	3.028			3		3.01	3	4.02	3.012			3.009
	3.028			3		3.01	3	4.02	3.012			3.009
	3.028			3		3.01	3	4.02	3.012			3.009
	3.028			3		3.01	3	4.02	3.01			3.009
	3.028			3		3.01	3	4.02	3.01			3.009
	3.028			3		3.01	3	4.02	3.01			3.009
	3.028			3		3.01	3	4.02	3.01			3.009
	3.028			3		3.01	3	4.02	3.01			3.009
	3.028			3		3.009	3	4.02	3.01			3.009
	3.028			3		3.009	3	4.02	3.01			3.009
	3.028			3		3.009	3	4.02	3.01			3.009
	3.028			3		3.009	3	4.02	3.01			3.009
	3.028			3		3.009	3	4.019	3.01			3.009
	3.028			3		3.008	3	4.019	3.01			3.009
	3.028			3		3.008	3	4.019	3.01			3.009
	3.028			3		3.008	3	4.019	3.01			3.009
	3.028			2		3.008	3	4.019	3.01			3.009
	3.027			2		3.008	3	4.019	3.01			3.009
	3.027			2		3.008	3	4.019	3.01			3.009
	3.027			2		3.008	3	4.019	3.01			3.009
	3.027			2		3.008	3	4.019	3.01			3.009
	3.027			2		3.008	3	4.019	3.01			3.009
	3.027			2		3.008	3	4.019	3.01			3.009
	3.027			2		3.008	3	4.019	2.02			3.009
	3.027			2		3.008	3	4.019	2.02			3.009
	3.027			2		3.008	3	4.019	2.02			3.009
	3.027			2		3.008	3	4.019	2.02			3.009
	3.027			2		3.008	3	4	2.011			3.009
	3.027			2		3.008	3	3.02	2.011			3.009
	3.027			2		3.008	2	3.02	2.011			3.009
	3.027			2		3.008	2	3.02	2.011			3.009
	3.027			2		3.008	2	3.02	2.011			3.009
	3.027			2		3.008	2	3.02	2.011			3.009
	3.027			2		3.008	2	3.02	2.011			3.009
	3.027			2		3.008	2	3.02	2.011			3.009
	3.027			2		3.008	2	3.02	2.011			3.009
	3.027			2		3.008	2	3.02	2.011			3.009
	3.027			2		3.008	2	3.02	2.011			3.009
	3.027			2		3.008	2	3.02	2.011			3.009
	3.027			2		3.008	2	3.02	2.011			3.009
	3.027			2		3.008	2	3.02	2.011			3.009
	3.027			2		3.008	2	3.02	2.011			3.009
	3.027			2		3.008	2	3.02	2.011			3.009
	3.027			2		3.008	2	3.02	2.011			3.009
	3.027			2		3.008	2	3.02	2.011			3.009
	3.027			2		3.008	2	3.02	2.011			3.009
	3.027			2		3.008	2	3.02	2.011			3.009
	3.027			1		3.008	2	3.02	2.011			3.009
	3.027			1		3.008	2	3.02	2.011			3.009
	3.027					3.008	2	3.02	2.011			3.006
	3.027					3.008	2	3.02	2.011			3.006
	3.027					3.008	2	3.019	2.011			3.006
	3.027					3.008	2	3.019	2.011			3
	3.027					3.006	2	3.019	2.011			3
	3.027					3.006	2	3.019	2.011			3
	3.027					3	2	3.016	2.01			3
	3.027					3	2	3.016	2.01			3
	3.027					3	2	3.016	2.01			2.01
	3.027					3	2	3.016	2.01			2.01
	3.027					3	2	3.016	2.01			2.01
	3.027					3	2	3.016	2.01			2.01
	3.027					3	2	3.016	2.01			2.01
	3.027					3	2	3.016	2.01			2.01
	3.027					3	2	3.016	2.01			2.01
	3.027					3	2	3.016	2.01			2.006
	3.027					2.01	1	3.016	2.01			2.006
	3.02					2.01		3.016	2.01			2.006
	3.02					2.01		3.016	2.01			2.006
	3.02					2.01		3.016	2.01			2.006
	3.02					2.01		3.016	2.01			2.006
	3.02					2.01		3.016	2.01			2.006
	3.02					2.009		3.016	2.01			2.006
	3.02					2.006		3.016	2.01			2.006
	3.02					2.006		3.016	2.01			2.006
	3					2.005		3.016	2.01			2.006
	2.02					2.005		3.016	2.006			2.006
	2.02					2.005		3.016	1.006			2.006
	2.02					2.005		3.016	1.006			2.006
	2.02					2.005		3.016				2.006
	2.02					2.005		3.016				2.006
	2.02					2.005		3.016				2.006
	2.02					2.005		3.016				2.006
	2.02					2.005		3.016				2.006
	2.02					2.005		3.016				2.006
	2.019					2.005		3.016				2.006
	2.019					2.005		3.016				2.006
	2.018					2.005		3.015				2.006
	2.018					2		3.015				2.006
	2.018					2		3.015				2.006
	2.018					2		3.015				2.003
	2.018					2		3.015				2.003
	2.018					2		3.015				2
	2.018					1		3.015				2
	2.018					1		3.015				2
	2.018							3.015				2
	2.018							3.015				2
	2.018							3.015				2
	2.018							3.015				2
	2.018							3.015				2
	2.018							3.015				1.003
	2.017							3.015				1.003
	2.017							3.015				1.003
	2.01							3.015				1
	2.01							3.015				1
	2.01							3.015
	2							3.015
	2							3.015
	1.009							3.015
								3.015
								3.015
								3.015
								3.015
								3.015
								3.015
								3.015
								3.015
								3.015
								3.014
								3.014
								3.014
								3.014
								3.014
								3.014
								3.014
								3.014
								3.014
								3.014
								3.01
								3.01
								3.01
								3.01
								3.01
								3.01
								3.01
								3.01
								3.01
								3.01
								3.01
								3.01
								3.01
								3.01
								3.01
								3.01
								3.01
								3.01
								3.01
								3.01
								3.01
								3.01
								3.01
								3.01
								3.01
								3.01
								3.01
								3.01
								3.01
								3.01
								3.01
								3.01
								3.01
								3.01
								3.01
								3
								2.011
								2.011
								2.011
								2.01
								2.01
								2.01
								2.01
								2.01
								2.01
								2.01
								2.01
								2.01
								2.01
								2.01
								2.01
								2.01
								2.01
								2.01
								2.01
								2.01
								2.01
								2.01
								2.01
								2.01
								2.01
								2.01
								2.01
								2.01
								2.01
								2.01
								2.01
								2.01
								2.01
								2.01
								2.01
								2.01
								2.01
								2.01
								2.01
								2.01
								2.01
								2.01
								2.01
								2.01
								2.01
								2.01
								2.01
								2.01
								2.01
								2.01
								2.01
								2.01
								2.009
								2
								2
								1.01
								1.01
								1.005
								1.005
								1

## Sheet: Burst
	Untreated	TC19_Coated	TC84_Coated	BP2_Coated	NisinA_coated	TC19_subinhibitory	TC84_subinhibitory	BP2_subinhibitory	NisinA_subinhibitory
Counts	369	168	188	270	33	52	117	317	52
Median	120.233	110.4	107.173	110.383	112.683	141.533	105.373	115.433	114.033
Q1	107.357	103.243	96.7858	99.3833	98.5633	126.033	98.3733	103.53	102.217
Q3	132.183	128.6	135.296	127.217	146.233	163.95	123.383	130.65	130.421
IQR	24.8266	25.3567	38.51	27.8334	47.67	37.9166	25.01	27.12	28.2041
	210.883	269.3	259	276.383	271.933	246.633	241.383	269.05	246.033
	198.783	202.5	251	273.217	234.733	223.633	227.383	262.05	236.217
	197.783	190.3	237	265.383	213.633	220.633	223.383	252.783	208.033
	191.833	188.233	228	260.217	205.533	216.633	207.383	218.733	181.217
	187.683	179.2	220	253.217	204.083	204.633	203.283	211.85	168.217
	182.067	177.133	214.183	238.083	179.433	200.633	187.283	210.85	157.033
	177.967	173.1	209	237.383	177.433	198.633	170.383	207.85	156.033
	177.583	173.1	207	223.217	150.233	197.633	166.383	205.85	144.033
	173.967	173.033	203	219.217	146.233	184.2	157.383	202.85	141.033
	172.733	171.1	201	215.217	145.233	173.533	148.383	191.75	140.033
	172.583	156.9	199	207.383	141.233	173.533	142.383	191.633	136.217
	169.967	152.9	198	205.383	137.233	165.533	136.383	188.583	132.033
	169.967	149.833	191	204.383	126.133	165.2	135.383	185.75	131.033
	169.633	148.8	190	197.383	125.133	163.533	134.383	185.75	130.217
	168.633	147.8	186	192.083	118.133	161.533	133.283	184.75	126.033
	168.633	147.733	179	188.217	116.133	161.533	131.383	183.75	121.033
	168.633	144.8	177	186.083	112.683	160.533	131.383	180.75	121.033
	167.867	144.8	177	182.083	109.053	157.2	131.383	180.75	120.217
	167.867	142.8	175	178.083	107.043	150.533	130.383	180.583	120.033
	166.867	141.733	172	177.083	104.593	150.533	130.383	178.633	120.033
	166.633	140.8	172	173.217	104.023	150.2	130.283	173.75	119.033
	165.867	140.8	172	172.383	100.003	147.533	128.383	173.633	119.033
	164.633	140.8	171	165.217	99.5633	145.533	128.383	172.583	118.033
	163.633	139.7	168	165.083	99.0033	145.533	127.383	171.75	118.033
	162.633	139.633	167	160.217	98.5633	144.533	127.383	164.75	116.033
	159.867	136.7	163	157.217	96.9933	142.533	126.383	164.75	114.033
	159.867	135.7	162	155.383	86.9333	140.533	125.383	163.75	114.033
	159.867	134.633	162	151.083	86.9333	140.533	125.283	163.75	113.217
	158.533	133.7	160	147.083	84.9233	138.2	124.383	161.75	113.217
	158.533	133.7	154	147.083	83.4833	137.533	123.383	157.65	113.033
	157.767	133.633	154	146.083	80.9033	137.2	122.383	156.65	112.217
	157.383	132.7	154	145.383	80.4633	136.2	122.283	154.65	112.217
	156.533	132.633	152	145.383	23.1633	133.2	121.383	154.65	112.033
	156.383	131.6	149	144.217		132.2	121.383	152.65	111.217
	155.533	131.6	149	144.217		130.533	121.383	151.483	110.033
	153.767	131.6	149	144.217		130.2	121.283	151.483	110.033
	153.383	131.6	146	143.217		129.533	118.383	148.65	106.033
	152.767	129.6	146	143.217		127.533	117.383	148.533	106.033
	152.383	129.6	144	142.217		126.2	117.383	148.533	102.217
	151.767	129.6	143	142.083		125.533	116.383	147.65	102.217
	151.767	128.6	143	140.083		124.533	116.283	147.65	102.033
	150.767	128.6	143	138.217		123.533	113.383	147.65	102.033
	150.533	128.6	141	138.083		119.533	113.383	146.65	102.033
	147.433	128.533	139	138.083		119.2	112.383	146.533	101.217
	147.383	123.5	138	138.083		117.533	112.283	146.483	97.2167
	147.383	123.5	137	137.083		117.2	111.383	145.533	96.2167
	147.383	122.5	136.183	137.083		116.2	111.383	145.533	96.0333
	146.433	121.433	135	137.083		108.1	110.383	144.65	95.0333
	146.433	121.433	135	135.217		107.1	110.383	144.65	94.0333
	145.667	120.5	135	135.083		107.1	110.283	144.533	86.2167
	144.433	119.5	134	134.217		106.14	110.283	144.483	84.2167
	143.667	119.5	132	134.083		97.12	109.373	144.483	84.0333
	143.667	119.5	130.183	134.083			108.373	143.65
	143.667	118.5	130.183	134.083			107.373	143.65
	142.667	117.5	130	132.383			107.373	142.533
	141.667	117.5	130	131.383			107.373	142.483
	140.667	117.5	129	131.083			107.273	141.483
	140.667	116.5	125.183	130.383			107.273	140.65
	140.667	116.5	125	130.383			105.373	140.65
	140.667	116.5	124	130.383			105.373	140.65
	140.283	116.5	124	130.083			105.373	140.65
	139.667	116.5	123.183	129.383			104.373	140.65
	138.667	115.5	123	129.217			104.373	139.65
	138.667	115.5	123	128.217			104.373	139.65
	138.667	115.5	121	128.083			104.373	137.65
	138.433	115.433	121	128.083			103.373	137.65
	138.433	114.4	120.183	127.383			103.373	136.65
	138.433	114.4	120	127.217			103.373	136.65
	138.283	114.4	120	127.217			103.273	136.65
	137.433	114.4	119	127.083			103.273	135.533
	137.433	114.4	118	126.383			102.373	134.65
	137.283	113.4	117	126.217			102.373	134.533
	136.667	113.4	115.183	125.383			102.373	134.483
	136.667	113.4	115	125.217			102.373	132.65
	136.333	112.4	114	125.083			102.273	132.533
	135.567	112.4	114	125.083			102.273	131.65
	135.567	112.4	114	124.217			102.273	131.533
	135.567	111.4	113.183	124.217			101.373	130.65
	135.333	111.333	113	123.217			101.373	130.65
	135.333	110.4	113	123.217			101.273	130.65
	135.183	110.4	112.183	123.217			100.373	130.533
	134.567	110.4	112	123.083			100.273	129.65
	134.333	110.4	111.183	123.083			100.273	129.65
	134.183	110.4	111	123.083			100.273	129.533
	133.567	110.4	110.173	122.217			99.3733	129.533
	133.333	110.4	110.173	122.217			99.2733	128.65
	132.567	110.4	110	122.083			99.2733	128.65
	132.567	109.4	110	121.383			98.3733	128.65
	132.567	109.4	110	121.217			98.3733	128.65
	132.567	109.4	108.99	121.217			98.2733	128.65
	132.567	109.333	108.173	121.083			97.3733	128.533
	132.333	109.333	107.99	120.217			97.3733	128.483
	132.183	109.333	107.173	120.083			97.3733	127.533
	132.183	108.37	107.173	119.217			96.2733	127.533
	131.567	108.303	107.173	119.217			95.3733	126.65
	131.567	107.36	107.173	119.217			95.2733	126.65
	131.567	107.36	106.99	119.217			95.2733	125.65
	131.567	107.36	106.99	119.217			95.2733	124.55
	131.333	107.293	106.99	119.217			94.3733	124.55
	131.183	106.34	106.99	119.083			93.3733	124.433
	130.567	106.34	106.173	119.083			93.2733	124.433
	130.333	106.34	106.173	118.217			92.3733	123.55
	130.333	106.34	105.99	118.217			91.3733	123.55
	129.567	106.34	105.173	118.083			91.3733	122.55
	129.567	106.34	104.99	118.083			91.2733	122.55
	129.333	105.33	104.173	118.083			89.3833	122.55
	128.567	105.33	103.99	117.217			89.2833	122.433
	128.567	105.33	103.173	117.217			89.2833	122.433
	128.567	105.33	103.173	117.083			88.2833	122.433
	128.333	105.33	103.173	117.083			87.2833	121.55
	128.183	105.33	103.173	117.083			86.2833	121.55
	127.567	105.33	103.173	116.383			84.3833	121.55
	127.567	105.33	102.99	116.217			83.3833	121.55
	127.567	105.33	102.99	116.217			83.2833	121.55
	127.567	105.33	102.99	115.217			82.2833	121.55
	127.567	105.33	102.173	115.083			79.2833	121.433
	127.333	105.33	101.173	114.383			71.3833	120.55
	127.333	105.33	101.173	114.383				120.55
	127.333	105.33	100.99	114.383				120.55
	127.333	105.33	100.99	114.217				120.55
	127.333	104.253	100.173	114.217				120.55
	127.183	104.253	100.173	114.083				120.55
	127.183	103.31	100.173	114.083				120.55
	127.183	103.31	99.1733	113.217				120.55
	127.183	103.31	98.1733	113.217				120.55
	126.567	103.243	98.1733	112.383				120.433
	126.567	103.243	98.1733	112.383				120.433
	126.333	103.243	98.1733	112.217				119.55
	126.333	102.3	97.99	112.217				119.433
	126.333	102.3	97.99	112.083				119.383
	126.333	102.3	97.99	112.083				119.383
	126.333	101.223	97.1733	111.217				119.383
	126.333	101.223	97.1733	111.217				118.55
	126.183	101.223	97.1733	111.083				118.55
	125.567	100.27	97.1733	110.383				118.55
	125.567	100.203	97.1733	110.383				118.433
	125.567	100.203	97.1733	110.383				118.433
	125.567	100.203	97.1733	109.383				118.433
	125.567	99.26	96.99	109.217				118.433
	125.233	99.1933	96.99	109.217				118.383
	125.233	99.1933	96.99	109.217				118.383
	125.183	98.1833	96.1733	109.217				117.55
	125.183	98.1833	96.1733	109.083				117.55
	125.183	97.24	96.1733	109.083				117.433
	125.183	97.1733	95.99	109.083				117.433
	125.183	96.23	95.1733	108.217				117.433
	124.467	96.1633	95.1733	108.217				117.433
	124.467	95.21	95.1733	108.217				116.55
	124.467	94.2	94.99	108.083				116.55
	124.467	94.2	94.1733	108.083				116.433
	124.467	94.2	94.1733	107.383				116.433
	124.467	94.2	94.1733	107.383				116.433
	124.233	94.1333	94.1733	107.383				116.383
	124.233	93.19	93.1733	107.217				115.55
	124.233	93.19	92.1733	107.217				115.55
	124.233	92.1133	92.1733	107.217				115.55
	124.083	90.0833	91.99	107.083				115.55
	124.083	89.0733	91.1733	106.383				115.55
	123.467	88.13	91.1733	106.383				115.433
	123.467	86.11	91.1733	106.383				115.383
	123.467	85.0233	90.99	106.383				114.55
	123.467	83.07	90.1733	106.217				114.55
	122.467	83.07	90.1733	106.083				114.55
	122.467	82.06	90.1733	106.083				114.55
	122.467	78.9533	88.1733	105.383				114.55
	122.467	77.9433	87.99	105.383				114.55
	122.233	76.9333	87.1733	105.383				114.55
	122.233	74.98	87.1733	105.083				114.55
	122.083		86.1733	104.383				114.55
	122.083		86.1733	104.217				114.433
	121.467		86.1733	104.217				114.433
	121.467		85.99	104.083				114.383
	121.233		85.99	104.083				113.55
	121.233		85.99	104.083				113.55
	121.083		85.1733	104.083				113.433
	120.467		84.1733	104.083				113.433
	120.467		82.1733	103.383				113.433
	120.467		81.99	103.383				112.55
	120.467		81.1733	103.383				112.55
	120.467		80.99	103.383				112.55
	120.467		79.99	103.217				112.433
	120.467		79.1833	103.217				112.433
	120.467		78.1833	103.083				112.433
	120.233		78.1833	103.083				112.383
	120.233		77.1833	103.083				111.55
	120.083		73.1833	103.083				111.55
	119.467		73.1833	102.383				111.55
	119.467		73.1833	102.217				111.55
	119.467			102.083				111.55
	119.467			101.383				111.433
	119.467			101.383				111.433
	119.233			101.217				111.383
	119.233			101.217				110.55
	119.233			101.083				110.55
	119.083			101.083				110.55
	118.467			101.083				110.433
	118.467			100.383				110.433
	118.467			100.383				110.383
	118.467			100.383				110.383
	118.467			100.383				109.55
	118.467			100.383				109.55
	118.233			99.3833				109.55
	118.233			99.3833				109.55
	118.083			99.3833				109.55
	118.083			99.2167				109.55
	117.467			99.0833				109.433
	117.467			99.0833				109.433
	117.467			98.3833				108.55
	117.467			98.3833				108.433
	117.467			98.3833				108.433
	116.467			98.3833				108.383
	116.467			98.0833				108.383
	116.467			97.3833				107.55
	116.467			97.3833				107.433
	116.467			97.2167				107.433
	116.233			97.0833				107.373
	116.083			97.0833				106.54
	116.083			96.3833				106.54
	116.083			96.2167				106.54
	116.083			95.3833				106.423
	115.467			95.3833				106.423
	115.467			95.3833				106.373
	115.083			95.0833				106.373
	114.467			94.3833				105.54
	114.467			94.3833				105.54
	114.467			93.3833				105.423
	114.467			93.2167				105.423
	114.467			93.2167				104.54
	114.467			93.0833				104.54
	114.467			92.3833				104.54
	114.467			92.2167				104.54
	114.083			91.3833				104.54
	114.083			91.3833				104.423
	113.367			90.3833				104.363
	113.367			89.3833				104.363
	113.367			89.0833				104.363
	113.367			89.0833				103.53
	113.367			89.0833				103.53
	113.133			88.3833				103.413
	112.983			88.3833				103.363
	112.367			88.3833				102.53
	112.367			88.3833				102.53
	112.367			88.0833				102.53
	112.367			87.0833				102.53
	111.983			86.3833				102.413
	111.367			86.3833				102.413
	111.367			86.0833				102.363
	111.367			85.3833				102.363
	111.367			84.3833				101.413
	111.367			84.3833				101.413
	110.367			84.3833				101.413
	110.367			84.0833				100.53
	110.367			83.3833				100.53
	110.367			83.3833				100.53
	110.367			82.0833				100.53
	110.367			82.0833				100.413
	110.367			81.3833				100.413
	110.133			81.0833				100.353
	109.983			80.3833				100.353
	109.367			80.3833				100.353
	109.367			80.3833				99.52
	109.367			80.3833				99.52
	109.367			79.3833				99.4033
	109.367			79.0833				99.4033
	109.367			78.3833				99.4033
	109.133			78.3833				99.4033
	108.983			77.3833				99.3533
	108.367			76.3833				98.4033
	108.367			75.3833				98.4033
	108.367			72.3833				98.3533
	108.367							97.4033
	108.367							97.4033
	108.367							97.4033
	108.367							96.3933
	108.367							96.3933
	107.983							95.51
	107.357							95.51
	107.113							95.51
	106.347							95.3933
	106.347							95.3933
	106.347							94.51
	106.103							94.51
	106.103							94.3933
	105.963							94.3933
	105.963							94.3933
	105.337							94.3933
	105.337							94.3333
	105.337							93.5
	105.337							93.5
	105.337							93.3833
	105.337							93.3833
	105.337							93.3333
	105.093							92.5
	105.093							92.5
	104.953							91.5
	104.953							91.3833
	104.327							91.3833
	104.327							91.3833
	104.327							91.3333
	104.327							90.5
	104.327							90.5
	104.327							90.3833
	104.327							90.3833
	103.317							89.49
	103.317							89.3233
	103.317							89.3233
	103.317							88.3733
	103.317							87.49
	103.317							84.48
	102.933							84.48
	102.307							83.3533
	102.307							83.3533
	102.307							82.47
	102.307							82.3533
	102.063							81.47
	102.063							80.3533
	101.297							77.46
	101.297
	101.297
	100.287
	100.287
	100.287
	100.287
	100.287
	100.287
	99.2867
	99.2867
	99.2867
	99.2867
	99.2867
	99.2867
	98.9033
	98.2767
	98.2767
	98.2767
	98.2767
	98.2767
	98.2767
	98.0333
	97.2667
	97.2667
	97.2667
	97.2667
	96.2567
	96.2567
	96.2567
	96.2567
	96.2567
	95.8733
	95.2467
	94.8633
	94.8633
	94.8633
	94.2367
	94.2367
	94.2367
	93.2267
	91.2067
	91.2067
	88.1867
	88.1867
	88.1867
	88.1867
	86.1667
	85.1567
	85.1567
	84.1467
	84.1467
	73.0467

## Sheet: Generation time
	Untreated	TC19_Coated	TC84_Coated	BP2_Coated	NisinA_coated	TC19_subinhibitory	TC84_subinhibitory	BP2_subinhibitory	NisinA_subinhibitory
Count	345	151	177	210	28	49	129	288	52
Median	43.6961	41.8343	40.1235	42.8675	39.6887	43.7319	41.3745	53.4343	38.719
Q1	40.3259	40.506	39.1119	40.4381	38.1641	42.0255	39.9231	43.6611	37.6102
Q3	49.3618	43.5108	41.8243	47.5524	40.8746	47.117	43.5218	76.5867	40.4355
IQR	9.0359	3.00475	2.7124	7.11427	2.71052	5.0915	3.5987	32.9256	2.82535
	90.2259	68.5672	57.5109	98.8065	44.2675	110.62	51.1755	981.908	47.4624
	82.7343	64.5099	54.1945	83.6063	43.721	80.4757	50.8704	913.53	45.7375
	81.4223	56.2845	53.7813	82.7651	41.8344	78.1498	50.5762	860.966	44.993
	76.5979	53.5544	52.7932	72.9774	41.4494	66.037	50.0317	639.369	42.8537
	76.0606	52.2512	50.5582	71.2228	41.273	61.8954	49.5204	555.078	42.3472
	68.4526	52.2317	48.8987	66.5421	41.2116	57.7529	48.7352	555.039	42.3329
	68.1619	51.4605	48.167	66.3981	40.9933	54.0755	47.9852	511.17	41.5721
	67.6329	49.2369	47.8445	65.8658	40.8351	53.7506	47.758	482.132	41.388
	67.6169	48.8992	47.685	64.1377	40.8115	51.059	47.6724	428.178	41.3472
	66.4317	48.7744	47.329	63.7809	40.1775	49.9278	47.6288	393.559	41.0633
	66.0405	46.8841	46.3562	63.6811	40.0646	48.1964	47.4984	386.969	40.9703
	65.7992	46.8766	46.2901	63.0053	39.983	47.5603	47.4921	382.719	40.7523
	65.7058	46.8082	45.327	62.621	39.9244	47.117	47.3904	381.558	40.5306
	63.2176	46.5982	44.8364	61.5024	39.8503	46.8009	47.0662	340.951	40.4038
	62.8272	46.4594	44.5243	61.0432	39.5271	46.7275	47.0447	303.511	40.3121
	62.4341	46.3955	44.5237	60.5707	39.4665	46.5268	46.8891	302.571	40.2299
	62.3726	46.3047	44.275	60.2695	39.3707	45.8801	46.6099	298.304	40.0302
	61.6278	46.1336	44.0912	59.0397	39.1225	45.6327	46.5466	293.877	40.0163
	61.4352	45.945	44.0611	58.3384	39.1007	45.2936	45.9531	281.092	39.7441
	61.4211	45.5862	43.7185	57.554	38.9247	45.0056	45.4794	272.746	39.7143
	61.1612	45.4397	43.3227	56.5731	38.3458	44.3244	45.2703	271.505	39.55
	60.5283	45.3988	43.1326	54.5448	37.6191	44.2574	45.2183	263.472	39.314
	60.2023	45.2447	42.9895	54.367	37.0638	43.833	45.1289	256.53	39.0548
	59.9054	45.2384	42.8638	54.3051	36.503	43.8297	45.1053	172.655	38.9968
	59.6333	45.1764	42.8612	54.283	36.2627	43.7319	44.9516	168.882	38.9945
	59.4854	45.0862	42.8381	54.1754	35.7165	43.7274	44.6822	160.556	38.765
	59.2811	44.965	42.6966	53.692	35.5066	43.5162	44.2829	155.785	38.673
	59.1447	44.9081	42.6364	52.5131	35.1981	43.3689	44.1975	154.112	38.6036
	58.8901	44.6623	42.558	51.9276		43.1476	44.1445	148.427	38.5336
	58.6404	44.3665	42.5576	50.64		43.1134	43.8053	135.865	38.4952
	58.5943	44.3123	42.5496	50.1676		42.8658	43.7635	124.229	38.1543
	57.8026	44.2311	42.4627	50.0378		42.6263	43.5968	123.125	38.1525
	57.6024	44.1544	42.4146	49.9232		42.6146	43.5218	121.54	38.0567
	57.2997	44.0112	42.3842	49.8748		42.5011	43.4722	119.445	38.0197
	57.0727	43.8835	42.353	49.8449		42.2335	43.3778	119.142	37.9079
	56.9529	43.7169	42.3115	49.8117		42.1253	43.3506	114.53	37.8421
	56.8656	43.7078	42.2331	49.5536		42.0255	43.3267	111.351	37.8151
	56.8199	43.5132	42.1741	49.423		41.8501	43.2952	111.012	37.7294
	56.5965	43.5083	42.0982	49.2934		41.1907	43.26	108.339	37.6405
	56.4793	43.4109	42.0124	49.1906		40.9903	43.0598	107.563	37.5191
	56.2376	43.3888	41.9845	48.8907		40.5484	42.8483	106.259	37.3372
	56.2207	43.3373	41.9013	48.8406		39.6798	42.7952	104.233	37.2349
	55.6164	43.3265	41.8901	48.5021		39.5145	42.6806	101.063	36.9648
	54.6921	43.282	41.8703	48.3482		39.1564	42.6743	100.645	36.8904
	53.9501	43.2717	41.8243	48.0927		38.7936	42.6569	99.9257	36.8642
	53.6199	43.2613	41.806	48.0586		38.0622	42.6425	98.8283	36.7606
	53.6007	43.1058	41.7523	47.9206		38.0466	42.633	98.2066	36.4889
	53.1099	43.046	41.7022	47.8207		37.6679	42.4612	97.6653	36.4449
	52.9784	42.9724	41.6714	47.7688		35.5882	42.4071	95.6055	36.0393
	52.9603	42.8983	41.4832	47.768			42.3653	92.4205	35.8115
	52.9166	42.8384	41.4612	47.7286			42.3532	89.9953	34.9532
	52.8121	42.8155	41.3617	47.6615			42.2226	89.4774	33.6657
	52.7942	42.8012	41.3205	47.5902			42.1997	88.06
	52.6755	42.7745	41.3196	47.4389			42.1896	85.9637
	52.4532	42.7445	41.3184	47.3116			42.1373	84.1493
	52.3861	42.7371	41.2992	46.9934			42.0763	82.8486
	52.1749	42.6715	41.2543	46.7409			41.9456	82.3801
	52.1111	42.568	41.2501	46.6849			41.9127	81.7704
	51.788	42.5495	41.1224	46.5643			41.8742	81.2846
	51.7449	42.5174	41.0306	46.5418			41.648	81.0482
	51.5182	42.517	41.0172	46.5073			41.5678	80.9921
	51.508	42.5082	40.9733	46.502			41.4362	79.7063
	51.3239	42.4452	40.9552	46.4255			41.4339	79.2852
	51.3128	42.4054	40.8384	46.252			41.3928	78.8285
	51.227	42.3505	40.794	46.2479			41.3745	78.6514
	51.1405	42.3133	40.7362	46.1572			41.3162	78.3999
	51.0838	42.2662	40.7145	45.8332			41.2766	78.3493
	50.9376	42.2523	40.7011	45.6754			41.2522	78.0692
	50.8166	42.1658	40.6772	45.5755			41.0833	77.4157
	50.8126	42.1402	40.6511	45.5689			40.9994	77.3134
	50.7992	42.1349	40.6339	45.3672			40.9032	77.2346
	50.7238	42.1295	40.6091	45.2384			40.8829	76.9134
	50.5719	42.0438	40.6064	45.2151			40.8344	76.4778
	50.3559	42.021	40.5064	45.18			40.7844	75.4071
	50.2036	41.9598	40.4609	45.0504			40.7367	75.3632
	50.1096	41.8343	40.4243	44.9052			40.6623	74.6019
	50.1052	41.8145	40.3981	44.8094			40.6506	73.9995
	50.051	41.7576	40.3572	44.7505			40.6418	73.2827
	50.0263	41.7525	40.3533	44.6429			40.5914	73.1633
	49.9628	41.7469	40.3188	44.5698			40.513	71.9123
	49.7667	41.678	40.2399	44.5563			40.4967	71.391
	49.7284	41.6622	40.2294	44.5288			40.4815	71.2285
	49.6957	41.5648	40.2106	44.4138			40.4757	70.8467
	49.655	41.5522	40.1924	44.3659			40.4485	70.5451
	49.4165	41.4508	40.1907	44.0628			40.4443	70.3944
	49.3731	41.4397	40.1791	44.0191			40.3552	70.2826
	49.3618	41.4065	40.1743	43.9444			40.3188	70.2767
	49.3156	41.3896	40.1726	43.8746			40.2867	69.6019
	49.3156	41.3175	40.1235	43.8727			40.2856	69.2068
	49.1911	41.3134	40.013	43.7797			40.2689	69.1262
	49.1819	41.2808	40.0051	43.7026			40.2186	69.0434
	48.8766	41.2805	39.9945	43.6883			40.2122	68.7609
	48.7242	41.2805	39.9853	43.6249			40.1631	68.691
	48.6078	41.277	39.9458	43.5819			40.143	68.0034
	48.5877	41.2098	39.9262	43.555			39.9421	67.5876
	48.4614	41.1358	39.8924	43.4677			39.9385	67.4629
	48.4401	41.045	39.8817	43.4496			39.9231	66.1185
	48.3297	41.023	39.8474	43.386			39.8888	65.9132
	48.3213	41.0071	39.8151	43.1824			39.8624	65.8716
	48.2456	40.9894	39.8073	43.1589			39.7509	65.3241
	48.1261	40.974	39.7898	43.1332			39.7294	65.0347
	48.1006	40.9557	39.7856	43.1175			39.7202	64.9811
	48.005	40.8978	39.731	43.0963			39.6638	64.3003
	47.9853	40.8383	39.7297	42.9808			39.6441	64.0041
	47.945	40.8259	39.7088	42.9015			39.6325	63.5497
	47.8939	40.7582	39.708	42.8336			39.6271	62.8553
	47.8711	40.7538	39.7055	42.6757			39.5772	62.7154
	47.6417	40.7382	39.6777	42.6195			39.5671	62.6339
	47.621	40.709	39.5642	42.597			39.541	62.3903
	47.6122	40.6625	39.5241	42.5596			39.5404	62.2892
	47.4039	40.5944	39.5166	42.4787			39.4627	62.0825
	47.3531	40.5892	39.5157	42.459			39.3297	62.0177
	47.3522	40.5103	39.5108	42.3931			39.2754	61.9003
	47.2516	40.5017	39.5056	42.3735			38.9804	61.393
	47.2187	40.465	39.4813	42.3602			38.8303	61.2731
	46.9481	40.4334	39.4566	42.329			38.8283	61.1665
	46.7342	40.3984	39.451	42.1307			38.6966	61.1579
	46.6817	40.3866	39.4373	42.0768			38.6019	61.0632
	46.6059	40.3322	39.4047	42.0442			38.5789	60.624
	46.5577	40.3304	39.3987	41.9405			38.5618	60.5754
	46.4975	40.2983	39.3926	41.9361			38.5391	60.4411
	46.4579	40.2944	39.386	41.8764			38.5252	60.2829
	46.4319	40.2562	39.379	41.8582			38.5174	60.1841
	46.4244	40.1676	39.3307	41.7624			38.4236	59.9426
	46.3686	40.1551	39.3274	41.7251			38.3624	58.4918
	46.348	40.1228	39.2908	41.6784			38.3423	58.0749
	46.201	40.1103	39.2752	41.6581			38.286	57.9863
	46.1983	39.9315	39.2109	41.6374			37.9792	57.9586
	46.173	39.8351	39.2101	41.5778			33.2247	57.2295
	46.1575	39.7894	39.1392	41.5589				57.0653
	46.1308	39.78	39.1324	41.5537				56.833
	46.1273	39.7073	39.1213	41.5326				56.4706
	46.0738	39.6959	39.1119	41.5177				56.4505
	45.9808	39.6592	39.101	41.4645				56.3449
	45.9797	39.4373	39.0799	41.4614				55.8473
	45.9716	39.2953	39.0765	41.4574				55.3224
	45.8997	39.2704	39.0457	41.45				55.1498
	45.8881	39.1932	39.0211	41.3606				54.9139
	45.8547	39.1211	38.9769	41.3173				54.8265
	45.6097	39.1086	38.9612	41.312				54.7465
	45.5144	38.8675	38.9555	41.301				54.437
	45.5102	38.6517	38.9488	41.2957				54.366
	45.4274	38.5936	38.9447	41.2538				53.952
	45.4192	38.5867	38.9235	41.1867				53.4896
	45.4036	38.3737	38.9081	41.1576				53.3789
	45.3856	37.6759	38.8943	41.0846				52.9914
	45.3829	37.1162	38.8173	41.0377				52.9094
	45.35	36.8672	38.7988	40.8815				52.7596
	45.3453	33.6866	38.7916	40.8041				52.6131
	45.2522	33.5451	38.7897	40.5842				52.3496
	45.2002	32.1917	38.7136	40.5773				52.2636
	45.1943		38.682	40.5598				51.9175
	44.9862		38.6672	40.5224				51.805
	44.588		38.6536	40.4954				51.5881
	44.4659		38.6377	40.475				51.3251
	44.4178		38.6282	40.4424				51.3119
	44.3578		38.5978	40.4414				51.1959
	44.2699		38.5924	40.437				50.7791
	44.254		38.587	40.3879				50.6772
	44.2533		38.4903	40.3481				50.5334
	44.2406		38.3929	40.2136				50.5303
	44.1839		38.2934	40.2056				50.4153
	44.1587		38.2514	40.1766				50.3308
	44.1439		38.2299	40.1456				50.2574
	44.1178		38.1818	40.0815				50.2521
	44.0889		38.1483	39.9926				49.9858
	44.0176		38.074	39.9447				49.8473
	43.9053		38.0285	39.9208				49.6783
	43.8294		37.985	39.9058				49.617
	43.7881		37.9584	39.869				49.5373
	43.7351		37.7696	39.8256				49.4075
	43.7256		37.7559	39.8018				49.2401
	43.6961		37.6185	39.7568				49.24
	43.6041		37.5741	39.7399				49.0483
	43.5749		37.4187	39.6756				48.92
	43.437		36.9649	39.6713				48.8187
	43.4201		35.1369	39.6704				48.5936
	43.2981			39.6286				48.5335
	43.2838			39.6227				48.5056
	43.2145			39.5753				48.4955
	43.2116			39.5392				48.441
	43.1196			39.5268				48.1014
	43.1041			39.4696				47.827
	42.9606			39.4409				47.699
	42.9582			39.4384				47.5325
	42.9096			39.3969				47.2557
	42.8434			39.3913				47.1777
	42.7366			39.3016				47.1583
	42.7109			39.2542				46.897
	42.7018			39.249				46.7378
	42.4896			39.2008				46.6617
	42.457			38.9852				46.6526
	42.4213			38.9765				46.6059
	42.404			38.9665				46.5219
	42.3517			38.966				46.4979
	42.3315			38.9515				46.445
	42.2795			38.7403				46.1217
	42.2735			38.6558				45.9771
	42.2438			38.6433				45.8894
	42.2011			38.6245				45.652
	42.1777			38.6102				45.3524
	42.0952			38.5276				45.1268
	42.084			38.4078				45.0435
	42.054			38.3729				44.9248
	42.0449			38.3425				44.8881
	42.0134			38.3412				44.7088
	42.0002			38.3146				44.6962
	41.9848			37.8444				44.5562
	41.9457			37.6299				44.4536
	41.8151			37.0652				44.4393
	41.5964							44.3455
	41.5769							44.0864
	41.5655							43.8577
	41.5452							43.8349
	41.5444							43.7595
	41.5257							43.7216
	41.5234							43.4798
	41.4398							43.385
	41.4249							43.3719
	41.3868							43.255
	41.3353							43.2298
	41.2881							43.1877
	41.2838							43.1658
	41.2595							43.0584
	41.2418							42.9429
	41.241							42.806
	41.2391							42.7202
	41.2254							42.6998
	41.2214							42.6622
	41.1962							42.5306
	41.172							42.4598
	41.1567							42.4232
	41.1476							42.407
	41.0947							42.3605
	41.0817							42.3325
	40.9754							42.2571
	40.9421							42.1766
	40.9146							42.1095
	40.8443							42.0888
	40.7841							42.0841
	40.7396							42.037
	40.7217							41.9812
	40.6992							41.8929
	40.6891							41.8717
	40.685							41.7931
	40.682							41.748
	40.6732							41.7076
	40.661							41.5711
	40.6492							41.5384
	40.5436							41.5116
	40.4804							41.2168
	40.4472							41.2135
	40.4165							41.1982
	40.4147							41.0974
	40.3864							40.9196
	40.372							40.8965
	40.3433							40.8746
	40.3329							40.8321
	40.3259							40.7314
	40.3227							40.7198
	40.2165							40.6664
	40.2153							40.6183
	40.1875							40.5962
	40.138							40.5893
	40.1154							40.5762
	40.0936							40.5563
	40.0909							40.4645
	40.0762							40.4163
	40.0726							40.3748
	40.0605							40.3657
	40.0124							40.2718
	39.9633							40.2299
	39.9325							40.183
	39.912							40.1812
	39.821							40.1328
	39.8062							40.1293
	39.7655							39.7004
	39.6634							39.6911
	39.6203							39.6332
	39.6174							39.5511
	39.6096							39.4901
	39.5954							39.1083
	39.5816							38.9807
	39.5814							38.8479
	39.5742							38.7712
	39.5724							38.3297
	39.5507							38.268
	39.5068							36.7322
	39.503
	39.4911
	39.4535
	39.4381
	39.4364
	39.3663
	39.2628
	39.2371
	39.2093
	39.1671
	39.1294
	39.0718
	39.0627
	39.0462
	38.9906
	38.958
	38.9264
	38.8385
	38.8228
	38.8046
	38.7591
	38.7557
	38.7188
	38.651
	38.5793
	38.5782
	38.5778
	38.527
	38.4809
	38.4803
	38.4515
	38.415
	38.4122
	38.3552
	38.3516
	38.3169
	38.2842
	38.1883
	38.07
	37.9839
	37.8353
	37.5979
	37.5384
	37.497
	37.4767
	37.4408
	37.251
	37.2332
	37.0561
	36.9135
	36.9089
	36.7692
	36.6985
	35.8659
	35.4786
	35.1575
	34.9288
